# Supplementary material for: Open-label, single-centre, cluster-randomised controlled trial to Evaluate the Potential Impact of Computerisedantimicrobial stewardship (EPIC) on the antimicrobial use after cardiovascular surgeries: EPIC trial study original protocol
Source: PubMed Central journal article supplement — BMJ Open. 2020 Nov 26;10(11):e039717. doi: 10.1136/bmjopen-2020-039717 (PMC7692825; doi:10.1136/bmjopen-2020-039717), 2020-11-26
Supplement: bmjopen-2020-039717.draft_revisions.pdf [file bmjopen-2020-039717.draft_revisions.pdf]

# BMJ Open

BMJ Open is committed to open peer review. As part of this commitment we make the peer review history of every article we publish publicly available.

When an article is published we post the peer reviewers' comments and the authors' responses online. We also post the versions of the paper that were used during peer review. These are the versions that the peer review comments apply to.

The versions of the paper that follow are the versions that were submitted during the peer review process. They are not the versions of record or the final published versions. They should not be cited or distributed as the published version of this manuscript.

BMJ Open is an open access journal and the full, final, typeset and author-corrected version of record of the manuscript is available on our site with no access controls, subscription charges or pay-per-view fees (<http://bmjopen.bmj.com>).

If you have any questions on BMJ Open's open peer review process please email [info.bmjopen@bmj.com](mailto:info.bmjopen@bmj.com)

# BMJ Open

**An open-label, single-centre, cluster-randomized, controlled trial to Evaluate the Potential Impact of Computerized antimicrobial stewardship (EPIC) on the antimicrobial use after cardiovascular surgeries: EPIC trial study original protocol**

|                               |                                                                                                                                                                                                                                                                                                                                                                                                                                                                                                                                                                                                                                                                                                                                                                                                                                                                                              |
|-------------------------------|----------------------------------------------------------------------------------------------------------------------------------------------------------------------------------------------------------------------------------------------------------------------------------------------------------------------------------------------------------------------------------------------------------------------------------------------------------------------------------------------------------------------------------------------------------------------------------------------------------------------------------------------------------------------------------------------------------------------------------------------------------------------------------------------------------------------------------------------------------------------------------------------|
| Journal:                      | <i>BMJ Open</i>                                                                                                                                                                                                                                                                                                                                                                                                                                                                                                                                                                                                                                                                                                                                                                                                                                                                              |
| Manuscript ID                 | bmjopen-2020-039717                                                                                                                                                                                                                                                                                                                                                                                                                                                                                                                                                                                                                                                                                                                                                                                                                                                                          |
| Article Type:                 | Protocol                                                                                                                                                                                                                                                                                                                                                                                                                                                                                                                                                                                                                                                                                                                                                                                                                                                                                     |
| Date Submitted by the Author: | 24-Apr-2020                                                                                                                                                                                                                                                                                                                                                                                                                                                                                                                                                                                                                                                                                                                                                                                                                                                                                  |
| Complete List of Authors:     | Yuan, Xin; Chinese Academy of Medical Sciences & Peking Union Medical College Fuwai Hospital<br>Chen, Kai; Chinese Academy of Medical Sciences & Peking Union Medical College Fuwai Hospital,<br>Zhao, Wei; Chinese Academy of Medical Sciences & Peking Union Medical College Fuwai Hospital, Information Centre<br>Hu, Shuang; Chinese Academy of Medical Sciences & Peking Union Medical College Fuwai Hospital<br>Yu, Fei; Chinese Academy of Medical Sciences & Peking Union Medical College Fuwai Hospital, Information centre<br>Diao, Xiaolin; Chinese Academy of Medical Sciences & Peking Union Medical College Fuwai Hospital, Information centre<br>Chen, Xingwei; Chinese Academy of Medical Sciences & Peking Union Medical College Fuwai Hospital, Department of pharmacy<br>Hu, Shengshou; Chinese Academy of Medical Sciences & Peking Union Medical College Fuwai Hospital |
| Keywords:                     | Cardiac surgery < SURGERY, Adult cardiology < CARDIOLOGY, Clinical trials < THERAPEUTICS                                                                                                                                                                                                                                                                                                                                                                                                                                                                                                                                                                                                                                                                                                                                                                                                     |
|                               |                                                                                                                                                                                                                                                                                                                                                                                                                                                                                                                                                                                                                                                                                                                                                                                                                                                                                              |

SCHOLARONE™  
Manuscripts

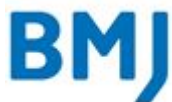

I, the Submitting Author has the right to grant and does grant on behalf of all authors of the Work (as defined in the below author licence), an exclusive licence and/or a non-exclusive licence for contributions from authors who are: i) UK Crown employees; ii) where BMJ has agreed a CC-BY licence shall apply, and/or iii) in accordance with the terms applicable for US Federal Government officers or employees acting as part of their official duties; on a worldwide, perpetual, irrevocable, royalty-free basis to BMJ Publishing Group Ltd ("BMJ") its licensees and where the relevant Journal is co-owned by BMJ to the co-owners of the Journal, to publish the Work in this journal and any other BMJ products and to exploit all rights, as set out in our [licence](#).

The Submitting Author accepts and understands that any supply made under these terms is made by BMJ to the Submitting Author unless you are acting as an employee on behalf of your employer or a postgraduate student of an affiliated institution which is paying any applicable article publishing charge ("APC") for Open Access articles. Where the Submitting Author wishes to make the Work available on an Open Access basis (and intends to pay the relevant APC), the terms of reuse of such Open Access shall be governed by a Creative Commons licence – details of these licences and which [Creative Commons](#) licence will apply to this Work are set out in our licence referred to above.

Other than as permitted in any relevant BMJ Author's Self Archiving Policies, I confirm this Work has not been accepted for publication elsewhere, is not being considered for publication elsewhere and does not duplicate material already published. I confirm all authors consent to publication of this Work and authorise the granting of this licence.

1  
2  
3  
4  
5  
6  
7  
8  
9  
10  
11  
12  
13  
14  
15  
16  
17  
18  
19  
20  
21  
22  
23  
24  
25  
26  
27  
28  
29  
30  
31  
32  
33  
34  
35  
36  
37  
38  
39  
40  
41  
42  
43  
44  
45  
46  
47  
48  
49  
50  
51  
52  
53  
54  
55  
56  
57  
58  
59  
60

April 13, 2020

*Protocol*

**An open-label, single-centre, cluster-randomized, controlled trial to Evaluate the Potential Impact of Computerized antimicrobial stewardship (EPIC) on the antimicrobial use after cardiovascular surgeries: EPIC trial study original protocol**

*Short title: Study protocol for EPIC*

Xin Yuan,<sup>1,2\*</sup> MD, PhD, Kai Chen,<sup>1,2\*</sup> MD, PhD, Wei Zhao,<sup>3</sup> PhD, Shuang Hu,<sup>4</sup> PhD,

Fei Yu,<sup>3</sup> BS, Xiaolin Diao,<sup>3</sup> MS, Xingwei Chen,<sup>5</sup> MS, Shengshou Hu,<sup>1,2</sup> MD

<sup>1</sup> State Key Laboratory of Cardiovascular Disease, Fuwai Hospital, National Centre for Cardiovascular Diseases, Chinese Academy of Medical Sciences and Peking Union Medical College, Beijing, China.

<sup>2</sup> Department of Cardiac Surgery, Fuwai Hospital, Chinese Academy of Medical Science and Peking Union Medical College, Beijing, China.

<sup>3</sup> Information Centre, Fuwai Hospital, Chinese Academy of Medical Science and Peking Union Medical College, Beijing, China.

<sup>4</sup> National Clinical Research Centre of Cardiovascular Diseases, State Key Laboratory of Cardiovascular Disease, Fuwai Hospital, National Centre for Cardiovascular Diseases, Chinese Academy of Medical Sciences and Peking Union Medical College, Beijing, China.

<sup>5</sup> Department of Pharmacy, Fuwai Hospital, Chinese Academy of Medical Science and Peking Union Medical College, Beijing, China.

\*These two authors contributed equally to this work as the first authors

Word count: 3038

Address for Correspondence:

Shengshou Hu, MD

1  
2  
3  
4 Fuwai Hospital, Peking Union Medical College  
5

6 167 Beilishi Road, Xicheng District, Beijing, P.R. China  
7

8  
9 Email: [huss@fuwaihospital.org](mailto:huss@fuwaihospital.org)  
10  
11  
12  
13  
14  
15  
16  
17  
18  
19  
20  
21  
22  
23  
24  
25  
26  
27  
28  
29  
30  
31  
32  
33  
34  
35  
36  
37  
38  
39  
40  
41  
42  
43  
44  
45  
46  
47  
48  
49  
50  
51  
52  
53  
54  
55  
56  
57  
58  
59  
60

For peer review only

## ABSTRACT

### Introduction

Inappropriate antimicrobial use increases the prevalence of antimicrobial resistant bacteria. Surgeons are reluctant to implement recommendations of guidelines in clinical practice. Antimicrobial stewardship (AMS) is effective in antimicrobial management, but it remains labour intensive. Computerized decision support system (CDSS) has been identified as effective way to enable key elements of AMS in clinical settings. However, insufficient evidence is available to evaluate the efficacy of computerized AMS in surgical settings.

### Methods and analysis

The Evaluate of the Potential Impact of Computerized antimicrobial stewardship (EPIC) trial is an open-label, single-centre, two-arm, cluster-randomized, controlled trial, which aims to determine whether a multicomponent CDSS intervention reduces overall antimicrobial use after cardiovascular surgeries compared with usual clinical care in a specialty hospital with a big volume of cardiovascular surgeries. Eighteen cardiovascular surgical teams will be randomized 1:1 to either the intervention or the control arm. The intervention will consist of (1) re-evaluation alerts and decision support for the duration of antimicrobial treatment decision, (2) re-evaluation alerts and decision support for the choice of antimicrobial, (3) quality control audit and feedback. The primary outcome will be the overall systemic antimicrobial use measured in days of therapy per admission over the whole intervention period (six months). Secondary outcomes include a series of indices to evaluate antimicrobial use, microbial resistance,

1  
2  
3 perioperative infection outcomes, patient safety, resource consumption and user  
4  
5 compliance and satisfaction.  
6  
7

### 8 9 **Ethics and dissemination**

10  
11  
12 The Ethics Committee in Fuwai hospital approved this study (2020-1329). The results  
13  
14 of the trial will be submitted for publication in a peer-reviewed journal.  
15  
16

17  
18 **Trial registration number:** NCT04328090.  
19

### 20 21 **Key words**

22  
23  
24 Antimicrobial stewardship; computerized decision support system; cardiovascular  
25  
26 surgery; randomized controlled trial.  
27  
28  
29  
30  
31  
32  
33  
34  
35  
36  
37  
38  
39  
40  
41  
42  
43  
44  
45  
46  
47  
48  
49  
50  
51  
52  
53  
54  
55  
56  
57  
58  
59  
60

### Strengths and limitations of this study

1. This adequately powered, cluster-randomized, controlled trial addresses many inadequacies in designs of the previous studies.
2. Different from previous studies in terms of the scope, setting and timing, the EPIC trial is among the first to assess the impact of CDSS tools on antimicrobial use in hospital settings.
3. To the best of our knowledge, this trial will be one of the first trials carried out in surgery settings.
4. This trial is a single centre study which may increase type II error.



## INTRODUCTION

Antimicrobial drug resistance among common bacterial pathogens has become a global health crisis.<sup>1-3</sup> It is reported that more than two million illnesses and 23,000 deaths are caused by antibiotic resistant bacteria in the America in 2017,<sup>4</sup> and this crisis is even more serious in low to middle income countries.<sup>5</sup>

Inappropriate antimicrobial use after surgeries increases the prevalence of antimicrobial resistant bacteria and subsequently subjects patients to unnecessary risk of adverse drug events and loads heavy economic burden on healthcare system.<sup>6 7</sup> However, despite many published guidelines and decades of efforts to change prescribing patterns, a survey revealed that the practice of antimicrobial use varies substantially among surgeons.<sup>8</sup> What's more, studies have shown that surgeons are reluctant to implement recommendations of guidelines in their routine clinical practice.<sup>9 10</sup> Therefore, interventions to standardize and audit surgeons' practice of antimicrobial use are quite important.

Antimicrobial stewardship (AMS), the primary goal of which is to optimize antimicrobial use, has been proven to be effective to improve surgical outcomes with increasing evidence.<sup>11-13</sup> However, as the idea becomes more widespread, implementing AMS remains a big challenge. Most of the AMS interventions require manual assessment and are best served by the expertise of infectious disease physicians or clinical pharmacists. The labour intensive nature have impeded AMS implementation on a large and sustainable scale.<sup>14 15</sup> Under circumstances where the important personnel are not adequate, computerized decision support system (CDSS) has been identified as one way to enable key elements of AMS in clinical settings.

However, little evidence is available to support the uptake of CDSS into AMS system

1  
2  
3 in surgical settings. There exist several studies,<sup>16</sup> but the controlled before-after and  
4 non-randomized feature in design may lead to bias and endanger the validity of causal  
5 inference.<sup>17</sup> Actually, related studies mainly focused on primary care and there is an  
6 obvious lack of high-quality studies assessing the impact of computer-based  
7 interventions on the in-hospital antimicrobial use in both surgical and non-surgical  
8 settings.<sup>18-20</sup> Therefore, on the basis of moderate-quality evidence in the literature, the  
9 2016 AMS guidelines by the Infectious Diseases Society of America and the Society  
10 for Healthcare Epidemiology of America gave “weak recommendation” on the  
11 integration of CDSS into AMS programs.<sup>21</sup>

22  
23  
24 To address this evidence gap, we planned to organize a cluster randomized trial in the  
25 largest cardiovascular surgery specialty hospital in China. We chose cardiovascular  
26 surgery rather than other surgical procedures because surgical site infections (SSIs)  
27 associated with cardiovascular surgeries can be particularly severe; what’s more,  
28 cardiovascular surgery-related SSIs are typically associated with skin flora and thus the  
29 evidence from this population may have significance for other surgical procedures.<sup>22-27</sup>

30  
31  
32 The aim of the EPIC trial is to assess if a multicomponent computer-based system  
33 incorporated into the workflow can reduce days of therapy (DOT) per admission after  
34 cardiovascular surgeries in the intervention surgical teams compared with controlled  
35 surgical teams, over a one-year period.

## 36 37 38 39 40 41 42 43 44 45 46 47 48 49 50 **METHODS/DESIGN**

51  
52  
53 This trial is an open-label, two-arm, cluster-randomized, controlled trial with  
54 cardiovascular surgical teams as the unit of randomization (Figure 1, flow chart).<sup>28</sup>  
55 Eligible teams (as defined in “Inclusion/exclusion criteria” section) with written  
56 consent are randomized to the intervention or control arm by using an interactive web  
57  
58  
59  
60

1  
2  
3 response system. Computer-based, multicomponent intervention targeting on reduction  
4 of perioperative antimicrobial use will be delivered to teams in the intervention arm.  
5  
6 Teams in the control arm will continue with usual clinical care.  
7  
8

9  
10  
11 A trial steering committee have been set up to monitor the conduct of the trial and the  
12 management of the data. Members of the trial steering committee will meet throughout  
13 the study period. The committee will include research staff, a clinical pharmacist, and  
14 two surgeons who is not directly involved in the trial.  
15  
16  
17  
18  
19

### 20 21 **Study setting**

22  
23  
24 The study will be launched in Fuwai Hospital, a 1500-bed tertiary care medical centre  
25 with an annual cardiovascular surgery volume of approximately 15,000 cases. Twenty-  
26 two surgical teams led by salaried specialists in Fuwai perform approximately 10,000  
27 various cardiovascular surgeries independently for adult patients (over the 18 years old).  
28  
29  
30  
31  
32

33  
34 Fuwai has deployed an in-house electronic medical record (EMR) system and a  
35 computerized physician order entry (CPOE) system since 2009. All the surgical teams  
36 fulfil the function of medical record management and physician order entry by using  
37 the in-house EMR and CPOE systems.  
38  
39  
40  
41  
42  
43  
44

### 45 **Inclusion/exclusion criteria**

46  
47  
48 At cluster level, eighteen adult cardiovascular surgical teams in Fuwai Hospital will be  
49 invited to participate in this trial. Two surgical teams dedicated to peripheral vessel  
50 surgeries (mainly stenting) and two dedicated to structural heart disease interventions  
51 are excluded because of their obviously different AMS protocols.  
52  
53  
54  
55  
56  
57

58 At physician level, the immediate participants in the research are all those who may  
59  
60

1  
2  
3 issue prescriptions for antimicrobial in the participant surgical teams.  
4  
5

6 At patient level, the inclusion criteria are: 1. Over 18 years of age; 2. Receiving at least  
7 one open-chest cardiovascular surgery during the same admission. The exclusion  
8 criteria are: 1. Intravenous or oral antimicrobial use within two weeks before surgery;  
9 2. Emergent/urgent surgery; 3. Admitted for isolated stenting or heart transplantation  
10 or implantation of ventricular assist device or implantation of extracorporeal membrane  
11 oxygenation; 4. Admitted for subacute bacterial endocarditis; 5. Length of ICU stay  
12 over 48 hours.  
13  
14  
15  
16  
17  
18  
19  
20  
21  
22

### 23 **AMS intervention**

#### 24 AMS protocol in Fuwai Hospital

25  
26  
27 The development of AMS program in Fuwai Hospital is based on previous guidelines  
28 as well as local policies.<sup>21 29-32</sup> The program is multifunctional with review of all  
29 positive blood cultures, regular teaching sessions for physicians, and internal/external  
30 audit of antimicrobial use and resistance. The program is regularly updated according  
31 to antimicrobial prescribing guidelines.  
32  
33  
34  
35  
36  
37  
38  
39  
40  
41

42 Briefly, a bundled intervention is implemented in routine workflow and comprises: 1.  
43 preoperative screening and decolonization; 2. an infusion of antimicrobial 30-60  
44 minutes before incision; 3. intraoperative redosing if the duration of the procedure  
45 exceeds three hours or two half-lives of the antimicrobial or there is excessive blood  
46 loss (mainly aortic surgeries); 4. A duration of antimicrobial prophylaxis no more than  
47 48 hours at postoperative stage; 5. Evaluation of microbiological findings,  
48 appropriateness of antimicrobial therapy, and de-escalation strategies at postoperative  
49 stage.  
50  
51  
52  
53  
54  
55  
56  
57  
58  
59  
60

## Computer based AMS intervention system

The intervention in the EPIC trial is targeted at control of postoperative antimicrobial use. The development of the computer-based multicomponent intervention is informed by existing medical records, behavioural intervention theory, systematic review evidence, qualitative research with trial and non-trial practices, clinical guidelines, and national policies.<sup>19-21 29-34</sup>

Computer-based evaluation will be activated at the time of the entry of antimicrobial order in the CPOE system. Popup banners, in a man-machine interactive manner, will appear in the centre of the screen to inform the physicians if violation against AMS rules is detected. General information about AMS rules will be provided as information buttons on the lower right corner of the screen. The interventions function in three domains (Figure 2):

- Re-evaluation alerts and decision support for the duration of antimicrobial treatment:

For prophylaxis use:

On postoperative calendar day three, a visual alert will routinely appear on the CPOE screen to remind the physicians to discontinue antimicrobial prophylaxis.

To be noted, the system will continuously assess patient-specific data such as clinical manifestations, routine blood test, x-ray, microbiological results or use of other medications within the first two postoperative days. If there are no signs of infection, discontinuance reminder will appear even if the duration of the antimicrobial prophylaxis treatment doesn't reach two days.

1  
2  
3 For treatment use:  
4  
5

6 The same mechanism functions for postoperative antimicrobial treatment  
7 (with signs of postoperative infection). Alert will appear on the calendar day  
8 six of the treatment; discontinuance alert, on the basis of clinical data, will  
9 appear on any day before calendar day six if there are no signs of infection.  
10  
11

12  
13  
14  
15  
16 If the antimicrobial treatment is modified before calendar day six, re-  
17 evaluation will be assumed to have taken place and no alert will be displayed  
18 on day six.  
19  
20  
21  
22

23  
24  
25 If the alerts mentioned above is ignored and the antimicrobial treatment is  
26 continued, physicians will be asked to provide accountable justifications. The  
27 options for justifications include prophylaxis, empiric, and targeted treatment;  
28 as for targeted treatment, a predefined list of potential reasons will be provided  
29 with the availability to also enter free text, making it possible to assess  
30 prescribing quality and to provide specific decision support.  
31  
32  
33  
34  
35  
36  
37  
38

39 ■ Re-evaluation alerts and decision support for the choice of antimicrobial:  
40

41  
42 Physicians will be asked to select the treatment type at the time of prescribing  
43 (prophylaxis, empiric or targeted treatment). At the same time, the system will  
44 evaluate the justifications of the prescription on clinical data and according to  
45 the basic AMS rules (a history of drug allergy, serum creatinine, drug  
46 incompatibility, et al.).  
47  
48  
49  
50  
51  
52  
53

54  
55 If the existing treatment strategy violates the basic AMS rules, the prescriber  
56 will be offered the choice to switch to the guideline-recommended treatment;  
57 otherwise prescribers will be asked to provide a justification for the deviation  
58  
59  
60

1  
2  
3 from the guidelines.  
4  
5

6 What's more, treatment with regard to intravenous-oral switch, de-escalation  
7  
8 or stopping therapy will be recommended by the system when appropriate.  
9  
10

11  
12 ■ Quality control audit and feedback:  
13  
14

15 Quality indicators of antimicrobial prescribing such as concordance with local  
16  
17 guidelines (in terms of duration of therapy and antimicrobial selected) will be  
18  
19 automatically assessed based on the information collected during the  
20  
21 prescribing process.  
22  
23

24  
25 Team leaders in a given participant team in the intervention arm will receive  
26  
27 monthly graphical reports outlining the performance of the team compared  
28  
29 with the other participating teams and compared with the guideline  
30  
31 recommendation (if applicable). The individual participant surgeons will  
32  
33 receive the monthly audit report of their own performance.  
34  
35  
36  
37

38 **Outcomes measures**  
39  
40

41 Table 1 gives a detailed information about primary and secondary outcomes, including  
42  
43 full names, abbreviations, definitions, and evaluation purposes.  
44  
45

46  
47 Primary outcome will be the overall systemic antimicrobial use measured in DOT of  
48  
49 systemic antimicrobial use per admission based on CPOE-derived data.  
50  
51

52 Secondary outcomes include a series of indices to evaluate antimicrobial use, microbial  
53  
54 resistance, perioperative infection outcomes, patient safety, resource consumption and  
55  
56 user compliance/satisfaction.  
57  
58  
59  
60

## Sample size

The sample size calculation is based on the primary outcome (DOT per admission) and has been performed taking into account the clustered design of the study according to the approach proposed in the literature.<sup>35</sup>

The mean annual surgery volume of a team is about 450 cases in Fuwai Hospital, then one team will include some 225 patients undergoing adult cardiac surgeries over the research period (six months). Assuming one team will recruit 125 eligible patients and assuming nine teams per arm with an average size of 1,125 admissions, antimicrobial use of 5.0 DOT/admission in the control group with a standard deviation of 2.0 (based on antimicrobial use data of 2019 in Fuwai hospital) and a two-sided type I error of 0.05, we would have a power of 80% to detect an absolute difference of at least 0.5 in average DOT/admission between the intervention and control arm.

## Blinding and randomization

Trial steering committee is responsible for recruiting surgical teams to the trial and supervising the research process but had no access to the randomization procedure. Extraction of the outcome measures will be performed primarily by research staff not directly involved in the study. The data analysts will be blinded to the randomization.

Neither the research staff directly involved in the intervention, nor the participant surgeons, nor the participant patients are blinded to the randomization due to the nature of the intervention.

Surgical teams will be randomized 1:1 to the intervention or control arm using an interactive web response system. The randomization plan will be established by research staff not directly involved in the study.



### Scheme for statistical analysis

The efficacies of the intervention will be evaluated by analysing EMR and CPOE data that are routinely collected into the Fuwai database. Data available for each patient will consist of his/her entire anonymized electronic case report form, including preoperative information (demographics, diagnosis, and comorbidities), surgical information, and details of all the drugs prescribed; anonymized surgeon information can be retrieved from the database of the personnel division of Fuwai. Written consents are obtained from both participant surgeons and participant patients.

Outcome variables will first be summarized across treatment and intervention groups and then explored using descriptive statistics. The DOT/admission at the individual level will be compared between the two arms using a random-effects Poisson model. The following confounders will be considered: 1. Patient: sex, age, type of comorbidities and type of cardiovascular surgeries; 2. Surgeon: age, annual volume, professional title and academic title. All variables that result in a change of >5% in the coefficient for the intervention effect in bivariate regression will be added to the multivariate model, and the most parsimonious model will be selected through the conditional AIC. Collinearity will be checked through a correlation matrix, whereby the most relevant, clinical variable will be selected in case of  $R^2 > 0.8$ .

The logistic regression analysis for clinical outcomes (indicators of patient safety, infection, and antimicrobial resistance) will estimate the difference (95% CI) in the outcome between intervention and control arms, adjusting for variables at patient level as well as surgeon level.

Data for healthcare usage and costs will be analysed at the individual level as reported previously.<sup>36</sup> Total cost and antimicrobial cost will be compared between trial arms. A

1  
2  
3 general linear model will be used to estimate the mean costs for the patients.  
4  
5

6  
7 As a part of process evaluation, users' compliance and satisfaction with the computer-  
8  
9 based intervention protocol will be assessed. As for user compliance, the evaluation  
10  
11 will be done by document the total number of times the intervention tools fail to change  
12  
13 the physicians' decision on antimicrobial prescription over the intervention period. The  
14  
15 number representing compliance will be divided into quartiles and a trend test will be  
16  
17 implemented by introducing these into analyses as continuous variables.  
18  
19

20  
21 As for user satisfaction, a series of questionnaire will be developed to explore  
22  
23 participants' experiences of using the intervention tools and experiences of the study  
24  
25 implementation. Inductive thematic analysis will be used to analyse qualitative data.  
26  
27  
28

### 29 **Data collection and process.**

30

31  
32 The in-hospital information will be retrieved from the hospital's database which is  
33  
34 stored in the form of electronic case report form. Surgical associated adverse events  
35  
36 and SSIs events within 30 days will be followed up. The detailed protocol about the  
37  
38 follow up were described elsewhere.<sup>37</sup> Briefly, patients discharged alive were followed  
39  
40 at regular time intervals including the time point of postoperative 30 day. If the patients  
41  
42 reported adverse events, the medical records of the patients in outpatient clinic of Fuwai  
43  
44 Hospital are double-checked. If the patients visit another hospital, patients are required  
45  
46 to send the paper copies of medical records by mail or photocopies through the internet.  
47  
48 De-identified data for research use will be stored in password-protected Microsoft  
49  
50 Excel files on secured hospital servers.  
51  
52  
53

54  
55  
56 For analysis, data will be imported into SAS version 9.4 (SAS Institute Inc, Cary, North  
57  
58 Carolina). Only investigators directly involved in the trial will have access to the data.  
59  
60

1  
2  
3 The data will be stored on secure servers with backup systems for five years after the  
4  
5 end of the trial.  
6  
7

### 8 9 **Duration of the trial**

10  
11  
12 The intervention period, lasting nine months, is composed of two parts: an internal pilot  
13  
14 period (three months) and the research period (six months).  
15  
16

17  
18 Before the launch of the research, an internal pilot will be conducted to demonstrate the  
19  
20 feasibility and acceptability of the intervention. Also, the pilot will allow a period for  
21  
22 the participant surgical teams to get familiar with the new computer-based tools for  
23  
24 AMS.  
25

26  
27  
28 In the pilot phase, intermediate outcome measures will include (1) the compatibility of  
29  
30 the new operation module with our EMR and EPOE systems; (2) evidence that the  
31  
32 intervention tools are accessed and used by prescribing members of staff in surgical  
33  
34 teams; and (3) successful delivery of regular feedback reports to surgical teams.  
35  
36

### 37 38 **Ethnics approval**

39  
40  
41 The Ethics Committee in Fuwai hospital approved this study. Participant surgeons in  
42  
43 Fuwai Hospital gave informed consent to the study. Although the intervention is at  
44  
45 surgical team level, patients' informed consents will be obtained. In addition, an  
46  
47 information leaflet will be provided to patients in the participating surgical teams.  
48  
49

### 50 51 **Patient and public involvement**

52  
53  
54  
55 Patients and public will not get involved in the development of the research question,  
56  
57 study design or any other part of this protocol.  
58  
59  
60

## Dissemination and reporting

Several publications in peer-reviewed journals are expected from this trial and these will include description of the intervention development of the intervention content and main findings of the trial. Also, the findings are planned to be presented at national and international conferences.

## DISCUSSION

Enlightened by the evidence in the literature, the EPIC trial is designed to evaluate the efficacy of CDSS-support tools to reduce postoperative antimicrobial use. The current study has several strengths and limitations.

Strengths: 1. This adequately powered, cluster-randomized, controlled trial addresses many inadequacies in designs of the previous studies;<sup>34 38-40</sup> 2. Different from previous studies in terms of the scope, setting and timing,<sup>16 18-20</sup> the EPIC trial is among the first to assess the impact of CDSS tools on antimicrobial use in hospital settings; 3. Also, to the best of our knowledge, this trial will be one of the first trials carried out in surgery settings. On the basis of the increasing incidence of antibiotic resistance, our efforts to find a way to achieve a more rational use of antimicrobial agents is justifiable.<sup>41 42</sup>

Limitations: this trial is a single centre study which may increase type II error. However, obvious heterogeneous organizations of AMS programs are noted among healthcare providers, possibly due to patient-specific considerations, institution-specific factors, and local antimicrobial use policies.<sup>43</sup> This multifactorial heterogeneity make it quite challenging to carry out multicentre trials because the various factors may be hard to be balanced or the huge sample size will be required which exceeds recruitment

1  
2  
3 capacity of the research program. Therefore, to carry out single centre trial in a large-  
4  
5 volume hospital with adequate surgical teams under the same AMS system is warranted.  
6  
7

8  
9 An important output of this research will be establishing a way of delivering a set of  
10  
11 computer-based multicomponent interventions to reduce antimicrobial use in surgical  
12  
13 settings. As a part of the current study, rigorous audit mechanisms will be conducted to  
14  
15 examine facilitators and barriers to implementation of this intervention and assess user  
16  
17 compliance/satisfaction with the intervention protocol. This will help to establish  
18  
19 whether the surgeon behaviour will be changed as a result of being exposed to the  
20  
21 intervention. If effective, the similar system could be easily translated into routine  
22  
23 surgical workflow in other hospitals at low cost.  
24  
25  
26  
27

### 28 **Conflicts of Interests**

29  
30  
31 None  
32  
33

### 34 **Author Statement**

35  
36  
37  
38 SSH conceived the original idea for this study which was further developed with all  
39  
40 authors, and secured funding for the study. XY and KC wrote the first draft of this  
41  
42 manuscript, and designed the CDSS. SH provided input regarding the sample size  
43  
44 calculations and statistical analysis. WZ, FY and XLD programmed CDSS. XWC  
45  
46 reviewed the regulations of CDSS according to the guidelines and policy. The  
47  
48 manuscript was reviewed and edited by all authors.  
49  
50  
51

### 52 **Acknowledgements**

53  
54  
55  
56 The authors would like to thank all participants of the EPIC trial team for the valuable  
57  
58 work in the study, including the cardiovascular surgeons and their patients.  
59  
60

## Funding

This work is supported by the Foundation No.83 of Fuwai Hospital.

For peer review only

## REFERENCES

1. Tackling a Crisis for the Future Health and Wealth of Nations. Review on Antimicrobial Resistance website. <http://amr-review.org/December2014>. Accessed March 4, 2020.
2. Office of the Press Secretary, The White House. Executive Order—Combating Antibiotic-Resistant Bacteria. Whitehouse. govwebsite. <https://www.whitehouse.gov/the-press-office/2014/09/18/executive-order-combating-antibiotic-resistant-bacteria>. 2014. March 4, 2020.
3. Branch-Elliman W, O'Brien W, Strymish J, et al. Association of Duration and Type of Surgical Prophylaxis With Antimicrobial-Associated Adverse Events. *JAMA Surg* 2019;154(7):590-98. doi: 10.1001/jamasurg.2019.0569 [published Online First: 2019/04/25]
4. Centers for Disease Control. Antibiotic/Antimicrobial Resistance. 2017 <https://www.cdc.gov/drugresistance/>. 2017. Accessed March 4, 2020.
5. Leaper DJ, Edmiston CE. World Health Organization: global guidelines for the prevention of surgical site infection. *J Hosp Infect* 2017;95(2):135-36. doi: 10.1016/j.jhin.2016.12.016 [published Online First: 2017/02/01]
6. Al-Mousa HH, Omar AA, Rosenthal VD, et al. Device-associated infection rates, bacterial resistance, length of stay, and mortality in Kuwait: International Nosocomial Infection Consortium findings. *Am J Infect Control* 2016;44(4):444-9. doi: 10.1016/j.ajic.2015.10.031 [published Online First: 2016/01/19]
7. Karanika S, Grigoras C, Flokas ME, et al. The Attributable Burden of Clostridium difficile Infection to Long-Term Care Facilities Stay: A Clinical Study. *J Am Geriatr Soc* 2017;65(8):1733-40. doi: 10.1111/jgs.14863 [published Online First: 2017/03/18]

- 1  
2  
3  
4 8. Alexiou VG, Ierodiakonou V, Peppas G, et al. Antimicrobial prophylaxis in surgery: an  
5  
6 international survey. *Surg Infect (Larchmt)* 2010;11(4):343-8. doi:  
7  
8 10.1089/sur.2009.023 [published Online First: 2010/08/11]  
9  
10  
11 9. Tourmousoglou CE, Yiannakopoulou E, Kalapothaki V, et al. Adherence to guidelines for  
12  
13 antibiotic prophylaxis in general surgery: a critical appraisal. *J Antimicrob Chemother*  
14  
15 2008;61(1):214-8. doi: 10.1093/jac/dkm406 [published Online First: 2007/11/15]  
16  
17  
18 10. Gagliotti C, Ravaglia F, Resi D, et al. Quality of local guidelines for surgical antimicrobial  
19  
20 prophylaxis. *J Hosp Infect* 2004;56(1):67-70. doi: 10.1016/j.jhin.2003.09.007  
21  
22 [published Online First: 2004/01/07]  
23  
24  
25 11. Manuel-Vazquez A, Palacios-Ortega F, Garcia-Septiem J, et al. Antimicrobial Stewardship  
26  
27 Programs Are Required in a Department of Surgery: "How" Is the Question A Quasi-  
28  
29 Experimental Study: Results after Three Years. *Surg Infect (Larchmt)* 2020;21(1):35-  
30  
31 42. doi: 10.1089/sur.2018.311 [published Online First: 2019/07/28]  
32  
33  
34 12. Ashfaq A, Zhu A, Iyengar A, et al. Impact of an Institutional Antimicrobial Stewardship  
35  
36 Program on Bacteriology of Surgical Site Infections in Cardiac Surgery. *J Card Surg*  
37  
38 2016;31(6):367-72. doi: 10.1111/jocs.12756 [published Online First: 2016/05/07]  
39  
40  
41 13. Schroder S, Klein MK, Heising B, et al. Sustainable implementation of antibiotic stewardship  
42  
43 on a surgical intensive care unit evaluated over a 10-year period. *Infection*  
44  
45 2020;48(1):117-24. doi: 10.1007/s15010-019-01375-6 [published Online First:  
46  
47 2019/11/14]  
48  
49  
50 14. Hersh AL, Beekmann SE, Polgreen PM, et al. Antimicrobial stewardship programs in  
51  
52 pediatrics. *Infect Control Hosp Epidemiol* 2009;30(12):1211-7. doi: 10.1086/648088  
53  
54  
55  
56  
57  
58  
59  
60



- 1  
2  
3  
4 [published Online First: 2009/10/27]  
5  
6  
7 15. Johannsson B, Beekmann SE, Srinivasan A, et al. Improving antimicrobial stewardship: the  
8  
9 evolution of programmatic strategies and barriers. *Infect Control Hosp Epidemiol*  
10  
11 2011;32(4):367-74. doi: 10.1086/658946 [published Online First: 2011/04/05]  
12  
13  
14 16. Vaisman A, McCready J, Hicks S, et al. Optimizing preoperative prophylaxis in patients with  
15  
16 reported beta-lactam allergy: a novel extension of antimicrobial stewardship. *J*  
17  
18 *Antimicrob Chemother* 2017;72(9):2657-60. doi: 10.1093/jac/dkx171 [published Online  
19  
20 First: 2017/06/13]  
21  
22  
23  
24 17. de Kraker MEA, Abbas M, Huttner B, et al. Good epidemiological practice: a narrative  
25  
26 review of appropriate scientific methods to evaluate the impact of antimicrobial  
27  
28 stewardship interventions. *Clin Microbiol Infect* 2017;23(11):819-25. doi:  
29  
30 10.1016/j.cmi.2017.05.019 [published Online First: 2017/06/03]  
31  
32  
33  
34 18. Gonzales R, Anderer T, McCulloch CE, et al. A cluster randomized trial of decision support  
35  
36 strategies for reducing antibiotic use in acute bronchitis. *JAMA Intern Med*  
37  
38 2013;173(4):267-73. doi: 10.1001/jamainternmed.2013.1589 [published Online First:  
39  
40 2013/01/16]  
41  
42  
43  
44 19. Gulliford MC, Prevost AT, Charlton J, et al. Effectiveness and safety of electronically  
45  
46 delivered prescribing feedback and decision support on antibiotic use for respiratory  
47  
48 illness in primary care: REDUCE cluster randomised trial. *BMJ* 2019;364:l236. doi:  
49  
50 10.1136/bmj.l236 [published Online First: 2019/02/14]  
51  
52  
53  
54 20. Curtis CE, Al Bahar F, Marriott JF. The effectiveness of computerised decision support on  
55  
56 antibiotic use in hospitals: A systematic review. *PLoS One* 2017;12(8):e0183062. doi:  
57  
58  
59  
60

- 1  
2  
3  
4 10.1371/journal.pone.0183062 [published Online First: 2017/08/25]  
5  
6  
7 21. Barlam TF, Cosgrove SE, Abbo LM, et al. Implementing an Antibiotic Stewardship Program:  
8  
9 Guidelines by the Infectious Diseases Society of America and the Society for  
10  
11 Healthcare Epidemiology of America. *Clin Infect Dis* 2016;62(10):e51-77. doi:  
12  
13 10.1093/cid/ciw118 [published Online First: 2016/04/16]  
14  
15  
16  
17 22. Dohmen PM. Influence of skin flora and preventive measures on surgical site infection  
18  
19 during cardiac surgery. *Surg Infect (Larchmt)* 2006;7 Suppl 1:S13-7. doi:  
20  
21 10.1089/sur.2006.7.s1-13 [published Online First: 2006/07/13]  
22  
23  
24  
25 23. Schweizer M, Perencevich E, McDanel J, et al. Effectiveness of a bundled intervention of  
26  
27 decolonization and prophylaxis to decrease Gram positive surgical site infections after  
28  
29 cardiac or orthopedic surgery: systematic review and meta-analysis. *BMJ*  
30  
31 2013;346:f2743. doi: 10.1136/bmj.f2743 [published Online First: 2013/06/15]  
32  
33  
34  
35 24. Garey KW, Dao T, Chen H, et al. Timing of vancomycin prophylaxis for cardiac surgery  
36  
37 patients and the risk of surgical site infections. *J Antimicrob Chemother*  
38  
39 2006;58(3):645-50. doi: 10.1093/jac/dki279 [published Online First: 2006/06/30]  
40  
41  
42  
43 25. Schersten H. Modified prophylaxis for preventing deep sternal wound infection after cardiac  
44  
45 surgery. *APMIS* 2007;115(9):1025-8. doi: 10.1111/j.1600-0463.2007.00837.x  
46  
47 [published Online First: 2007/10/13]  
48  
49  
50  
51 26. Garey KW, Amrutkar P, Dao-Tran TK, et al. Economic benefit of appropriate timing of  
52  
53 vancomycin prophylaxis in patients undergoing cardiovascular surgery.  
54  
55 *Pharmacotherapy* 2008;28(6):699-706. doi: 10.1592/phco.28.6.699 [published Online  
56  
57 First: 2008/05/28]  
58  
59  
60

- 1  
2  
3  
4 27. Garey KW, Lai D, Dao-Tran TK, et al. Interrupted time series analysis of vancomycin  
5  
6 compared to cefuroxime for surgical prophylaxis in patients undergoing cardiac surgery.  
7  
8  
9 *Antimicrob Agents Chemother* 2008;52(2):446-51. doi: 10.1128/AAC.00495-07  
10  
11 [published Online First: 2007/11/21]  
12  
13  
14 28. Linnan L, Steckler A. Process evaluation for public healthinterventions and research.  
15  
16 California:Jossey-Bass San Francisco, 2002.  
17  
18  
19 29. Sousa-Uva M, Head SJ, Milojevic M, et al. 2017 EACTS Guidelines on perioperative  
20  
21 medication in adult cardiac surgery. *Eur J Cardiothorac Surg* 2018;53(1):5-33. doi:  
22  
23 10.1093/ejcts/ezx314 [published Online First: 2017/10/14]  
24  
25  
26  
27 30. Bratzler DW, Dellinger EP, Olsen KM, et al. Clinical practice guidelines for antimicrobial  
28  
29 prophylaxis in surgery. *Am J Health Syst Pharm* 2013;70(3):195-283. doi:  
30  
31 10.2146/ajhp120568 [published Online First: 2013/01/19]  
32  
33  
34  
35 31. Reinforce the national antimicrobial stewardship, regulations enclosed.  
36  
37  
38 <http://www.nhc.gov.cn/zyygj/s3593/201508/f0fdf1f52df14b87aa97be53819f1036.shtml>  
39  
40 ]. 2015. Accessed March 6, 2020.  
41  
42  
43 32. Continue to implement national antimicrobial stewardship.  
44  
45  
46 [http://www.nhc.gov.cn/zyygj/s7659/201903/1d487eb7b7c74abc9fcb104f8b0905f2.sht](http://www.nhc.gov.cn/zyygj/s7659/201903/1d487eb7b7c74abc9fcb104f8b0905f2.shtml)  
47  
48 [ml](http://www.nhc.gov.cn/zyygj/s7659/201903/1d487eb7b7c74abc9fcb104f8b0905f2.shtml). March 2019. Accessed March 6, 2020.  
49  
50  
51 33. Linder JA, Meeker D, Fox CR, et al. Effects of Behavioral Interventions on Inappropriate  
52  
53 Antibiotic Prescribing in Primary Care 12 Months After Stopping Interventions. *JAMA*  
54  
55 2017;318(14):1391-92. doi: 10.1001/jama.2017.11152 [published Online First:  
56  
57 2017/10/20]  
58  
59  
60

- 1  
2  
3  
4 34. Demonchy E, Dufour JC, Gaudart J, et al. Impact of a computerized decision support  
5  
6 system on compliance with guidelines on antibiotics prescribed for urinary tract  
7  
8 infections in emergency departments: a multicentre prospective before-and-after  
9  
10 controlled interventional study. *J Antimicrob Chemother* 2014;69(10):2857-63. doi:  
11  
12 10.1093/jac/dku191 [published Online First: 2014/06/06]  
13  
14  
15  
16  
17 35. Leyrat C, Morgan KE, Leurent B, et al. Cluster randomized trials with a small number of  
18  
19 clusters: which analyses should be used? *Int J Epidemiol* 2018;47(1):321-31. doi:  
20  
21 10.1093/ije/dyx169 [published Online First: 2017/10/13]  
22  
23  
24  
25 36. Bhattarai N, Charlton J, Rudisill C, et al. Prevalence of depression and utilization of health  
26  
27 care in single and multiple morbidity: a population-based cohort study. *Psychol Med*  
28  
29 2013;43(7):1423-31. doi: 10.1017/S0033291712002498 [published Online First:  
30  
31 2012/11/02]  
32  
33  
34  
35 37. Hu S, Zheng Z, Yuan X, et al. Increasing long-term major vascular events and resource  
36  
37 consumption in patients receiving off-pump coronary artery bypass: a single-center  
38  
39 prospective observational study. *Circulation* 2010;121(16):1800-8. doi:  
40  
41 10.1161/CIRCULATIONAHA.109.894543 [published Online First: 2010/04/14]  
42  
43  
44  
45 38. Baysari MT, Lehnbohm EC, Li L, et al. The effectiveness of information technology to improve  
46  
47 antimicrobial prescribing in hospitals: A systematic review and meta-analysis. *Int J Med*  
48  
49 *Inform* 2016;92:15-34. doi: 10.1016/j.ijmedinf.2016.04.008 [published Online First:  
50  
51 2016/06/19]  
52  
53  
54  
55 39. Nachtigall I, Tafelski S, Deja M, et al. Long-term effect of computer-assisted decision  
56  
57 support for antibiotic treatment in critically ill patients: a prospective 'before/after' cohort  
58  
59  
60

- 1  
2  
3  
4 study. *BMJ Open* 2014;4(12):e005370. doi: 10.1136/bmjopen-2014-005370 [published  
5  
6  
7 Online First: 2014/12/24]  
8
- 9 40. Paul M, Andreassen S, Tacconelli E, et al. Improving empirical antibiotic treatment using  
10  
11 TREAT, a computerized decision support system: cluster randomized trial. *J*  
12  
13 *Antimicrob Chemother* 2006;58(6):1238-45. doi: 10.1093/jac/dkl372 [published Online  
14  
15 First: 2006/09/26]  
16  
17
- 18 41. Bratzler DW, Houck PM, Surgical Infection Prevention Guidelines Writers W, et al.  
19  
20 Antimicrobial prophylaxis for surgery: an advisory statement from the National Surgical  
21  
22 Infection Prevention Project. *Clin Infect Dis* 2004;38(12):1706-15. doi: 10.1086/421095  
23  
24 [published Online First: 2004/07/01]  
25  
26  
27
- 28 42. Miller LG, McKinnell JA, Vollmer ME, et al. Impact of methicillin-resistant *Staphylococcus*  
29  
30 *aureus* prevalence among *S. aureus* isolates on surgical site infection risk after  
31  
32 coronary artery bypass surgery. *Infect Control Hosp Epidemiol* 2011;32(4):342-50. doi:  
33  
34 10.1086/658668 [published Online First: 2011/04/05]  
35  
36  
37
- 38 43. Sartelli M, Labricciosa FM, Barbadoro P, et al. The Global Alliance for Infections in Surgery:  
39  
40 defining a model for antimicrobial stewardship-results from an international cross-  
41  
42 sectional survey. *World J Emerg Surg* 2017;12:34. doi: 10.1186/s13017-017-0145-2  
43  
44 [published Online First: 2017/08/05]  
45  
46  
47
- 48 44. Thygesen K, Alpert JS, Jaffe AS, et al. Fourth Universal Definition of Myocardial Infarction  
49  
50 (2018). *J Am Coll Cardiol* 2018;72(18):2231-64. doi: 10.1016/j.jacc.2018.08.1038  
51  
52 [published Online First: 2018/08/30]  
53  
54  
55
- 56 45. Ibrahim NH, Maruan K, Mohd Khairy HA, et al. Economic Evaluations on Antimicrobial  
57  
58  
59  
60

1  
2  
3  
4 Stewardship Programme: A Systematic Review. *J Pharm Pharm Sci* 2017;20(1):397-  
5  
6  
7

8  
9  
10  
11  
12  
13  
14  
15  
16  
17  
18  
19  
20  
21  
22  
23  
24  
25  
26  
27  
28  
29  
30  
31  
32  
33  
34  
35  
36  
37  
38  
39  
40  
41  
42  
43  
44  
45  
46  
47  
48  
49  
50  
51  
52  
53  
54  
55  
56  
57  
58  
59  
60  
406. doi: 10.18433/J3NW7G [published Online First: 2017/11/18]

For peer review only

**Table 1**  
**Outline of primary and secondary outcomes**

| Outcomes                                                                                                                                                                                                                                                                                 | Definition                                                                                                                                                                                                                                                                                          | Evaluation purposes                                                                                                                                                        |
|------------------------------------------------------------------------------------------------------------------------------------------------------------------------------------------------------------------------------------------------------------------------------------------|-----------------------------------------------------------------------------------------------------------------------------------------------------------------------------------------------------------------------------------------------------------------------------------------------------|----------------------------------------------------------------------------------------------------------------------------------------------------------------------------|
| <b>Primary outcomes</b>                                                                                                                                                                                                                                                                  |                                                                                                                                                                                                                                                                                                     |                                                                                                                                                                            |
| Days of antimicrobial therapy (DOT) per admission                                                                                                                                                                                                                                        | DOT:<br>One DOT represents a specific antibiotic administered to an individual patient on a calendar day independent of dose and route.                                                                                                                                                             | To evaluate the difference in overall systemic antimicrobial use in terms of duration of treatment and combination therapies between the intervention arm and control arm. |
| <b>Secondary outcomes</b>                                                                                                                                                                                                                                                                |                                                                                                                                                                                                                                                                                                     |                                                                                                                                                                            |
| <b>Antimicrobial use indicators</b>                                                                                                                                                                                                                                                      |                                                                                                                                                                                                                                                                                                     |                                                                                                                                                                            |
| <ol style="list-style-type: none"> <li>1. DOT per 100 patient-days (PD)</li> <li>2. Drug usage (DDD) per 100 PD and per admission</li> <li>3. Length of therapy (LOT) per 100 PD and per admission</li> <li>4. Days per treatment period overall and for specific indications</li> </ol> | <ol style="list-style-type: none"> <li>1. DDDs:<br/>Items issued×Amount of drug per item÷DDD*</li> <li>2. LOT:<br/>Number of days during which antimicrobial is used;</li> <li>3. Treatment period:<br/>Antibiotic treatment not interrupted by more than one calendar day or discharge.</li> </ol> | The same as the evaluation purposes for “DOT per admission”.                                                                                                               |
| <b>postoperative microbial resistance indicators</b>                                                                                                                                                                                                                                     |                                                                                                                                                                                                                                                                                                     |                                                                                                                                                                            |
| <ol style="list-style-type: none"> <li>1. Clostridium difficile colitis</li> <li>2. Incident clinical cultures with multidrug resistant organisms (MRSA, ESBL-E,</li> </ol>                                                                                                              | <ol style="list-style-type: none"> <li>1. Clostridium difficile colitis:<br/>Colitis associated with Clostridium difficile infection (ICD 10: A04.7)</li> </ol>                                                                                                                                     | To evaluate the efficacies of the computer-based multicomponent intervention to reduce the incidence of antimicrobial resistance.                                          |

|                                                                                                                                                                                                                                              |                                                                                                                                                                                                                                                                                                                                                                                                                                                                                                                                                                                                                                                                                                                                                                                                                                                                                      |                                                                                                                                                       |
|----------------------------------------------------------------------------------------------------------------------------------------------------------------------------------------------------------------------------------------------|--------------------------------------------------------------------------------------------------------------------------------------------------------------------------------------------------------------------------------------------------------------------------------------------------------------------------------------------------------------------------------------------------------------------------------------------------------------------------------------------------------------------------------------------------------------------------------------------------------------------------------------------------------------------------------------------------------------------------------------------------------------------------------------------------------------------------------------------------------------------------------------|-------------------------------------------------------------------------------------------------------------------------------------------------------|
| CRE, VRE, or Pseudomonas aeruginosa) per 1000 PD and admission.                                                                                                                                                                              |                                                                                                                                                                                                                                                                                                                                                                                                                                                                                                                                                                                                                                                                                                                                                                                                                                                                                      |                                                                                                                                                       |
| <p><b>Postoperative infection indicators</b></p> <ol style="list-style-type: none"> <li>1. In-hospital or 30-day surgical site infections (SSIs)</li> <li>2. In-hospital bloodstream infections</li> <li>3. In-hospital pneumonia</li> </ol> | <ol style="list-style-type: none"> <li>1. SSIs:<sup>30</sup><br/>Occurs within 30 days postoperatively and involves skin or subcutaneous tissue of the incision and at least one of the following: (1) purulent drainage from the incision, (2) organisms isolated from an aseptically obtained culture of fluid or tissue from the incision, (3) at least one of the following signs or symptoms of infection: pain or tenderness, localized swelling, redness, or heat, and incision is deliberately opened by surgeon and is culture-positive or not cultured (a culture-negative finding does not meet this criterion), and (4) diagnosis of SSI by the surgeon or attending physician.</li> <li>2. Blood stream infections:<br/>Blood stream infection after surgery (ICD 10: A41.9)</li> <li>3. Pneumonia:<br/>Pulmonary infection after surgery (ICD 10 : J98.402)</li> </ol> | <p>To evaluate the potential side-effects of the computer-based multicomponent intervention to elevate the incidence of antimicrobial resistance.</p> |
| <b>Patient safety indicators</b>                                                                                                                                                                                                             |                                                                                                                                                                                                                                                                                                                                                                                                                                                                                                                                                                                                                                                                                                                                                                                                                                                                                      |                                                                                                                                                       |



1  
2  
3  
4  
5  
6  
7  
8  
9  
10  
11  
12  
13  
14  
15  
16  
17  
18  
19  
20  
21  
22  
23  
24  
25  
26  
27  
28  
29  
30  
31  
32  
33  
34  
35  
36  
37  
38  
39  
40  
41  
42  
43  
44  
45  
46

|                                                                                                                                                                                                                                                                                                                   |                                                                                                                                                                                                                                                                                                                                                                                                                                                                                                                                                                                                                                                                                                                                                                                                                                                                                                                                                                                |                                                                                                                                                                                                                                                                                                                                                         |
|-------------------------------------------------------------------------------------------------------------------------------------------------------------------------------------------------------------------------------------------------------------------------------------------------------------------|--------------------------------------------------------------------------------------------------------------------------------------------------------------------------------------------------------------------------------------------------------------------------------------------------------------------------------------------------------------------------------------------------------------------------------------------------------------------------------------------------------------------------------------------------------------------------------------------------------------------------------------------------------------------------------------------------------------------------------------------------------------------------------------------------------------------------------------------------------------------------------------------------------------------------------------------------------------------------------|---------------------------------------------------------------------------------------------------------------------------------------------------------------------------------------------------------------------------------------------------------------------------------------------------------------------------------------------------------|
| <p>1. In-hospital or 30-day mortality, postoperative</p> <p>2. In-hospital or 30-day myocardial infarction (MI), postoperative and newly onset</p> <p>3. In-hospital or 30-day stroke, postoperative and newly onset</p> <p>4. In-hospital or 30-day acute kidney injury (AKI), postoperative and newly onset</p> | <p>1. MI (in accordance with the fourth edition of MI definition):<sup>44</sup></p> <p>Termed type 5 MI, procedure related MI. Briefly, the criteria are as follows:</p> <ul style="list-style-type: none"> <li>• Elevation of cTn&gt;10 times of the 9th percentile URL with patients with normal baseline;</li> <li>• For patients with elevated preprocedural cTn values, elevation of cTn&gt;10-fold increase and manifest a change from the baseline value of over 20%;</li> <li>• With as least one of the following:</li> <li>• Development of new pathological Q waves;</li> <li>• Imaging evidence of loss of viable myocardium that is presumed to be new and in a pattern consistent with an ischemic aetiology;</li> <li>• Angiographic findings consistent with a procedural flow-limiting complication.</li> </ul> <p>2. Stroke:</p> <p>Refers to newly onset stroke after surgery (ICD 10: I60.0-I60.9; I61.0-I61.9; I62.0; I62.1; I62.9; I63.0-I63.9; I64)</p> | <p>We do not anticipate any potential serious adverse events that could be directly attributable to the intervention but we could not rule out the indirect association between these outcomes and the intervention. Therefore, in consideration of patient safety issues, we will compare the surgical-related complications between the two arms.</p> |
|-------------------------------------------------------------------------------------------------------------------------------------------------------------------------------------------------------------------------------------------------------------------------------------------------------------------|--------------------------------------------------------------------------------------------------------------------------------------------------------------------------------------------------------------------------------------------------------------------------------------------------------------------------------------------------------------------------------------------------------------------------------------------------------------------------------------------------------------------------------------------------------------------------------------------------------------------------------------------------------------------------------------------------------------------------------------------------------------------------------------------------------------------------------------------------------------------------------------------------------------------------------------------------------------------------------|---------------------------------------------------------------------------------------------------------------------------------------------------------------------------------------------------------------------------------------------------------------------------------------------------------------------------------------------------------|

|                                                                                                                                                                                                                                                                  |                                                                                                                                                                                                                                                                                                                                                                                                                                                                                                                                                                                                                                                                                                                                                                                                                           |                                                                                                                                                                                                                    |
|------------------------------------------------------------------------------------------------------------------------------------------------------------------------------------------------------------------------------------------------------------------|---------------------------------------------------------------------------------------------------------------------------------------------------------------------------------------------------------------------------------------------------------------------------------------------------------------------------------------------------------------------------------------------------------------------------------------------------------------------------------------------------------------------------------------------------------------------------------------------------------------------------------------------------------------------------------------------------------------------------------------------------------------------------------------------------------------------------|--------------------------------------------------------------------------------------------------------------------------------------------------------------------------------------------------------------------|
|                                                                                                                                                                                                                                                                  | <p>3. AKI:<br/>Refers to newly onset AKI after surgery</p> <ul style="list-style-type: none"> <li>• Acute renal dysfunction within 48 hours (ICD 10: N17);</li> <li>• AKI stage I: creatinine <math>\geq 26.5 \mu\text{mol/L}</math>; creatinine over 1.5-1.9 times of baseline value; urine output <math>&lt; 0.5 \text{ml/kg/hour}</math> for 6-12 hours;</li> <li>• AKI stage II: creatinine over 2.0 to 2.9 times of baseline value; urine output <math>&lt; 0.5 \text{ml/kg/hour}</math> for over 12 hours;</li> <li>• AKI stage III: creatinine <math>\geq 353.6 \mu\text{mol/L}</math>; creatinine over 3 times of baseline value; initiation of renal replacement therapy; urine output <math>&lt; 0.3 \text{ml/kg/hour}</math> for <math>\geq 24</math> hours; anuria for <math>\geq 24</math> hours.</li> </ul> |                                                                                                                                                                                                                    |
| <p><b>Resource consuming indicators</b></p> <ol style="list-style-type: none"> <li>1. Length of hospital stay (LOS)</li> <li>2. Costs of administered antimicrobials (overall and by class) per admission</li> <li>3. Total costs of hospitalization.</li> </ol> | None                                                                                                                                                                                                                                                                                                                                                                                                                                                                                                                                                                                                                                                                                                                                                                                                                      | One of the main interest to various parts of the healthcare system. <sup>45</sup> These indicators are set to evaluate the efficacies of the computer-based AMS system to reduce the overall resource consumption. |
| <p><b>User compliance and satisfaction indicators</b></p> <ol style="list-style-type: none"> <li>1. User satisfaction with the system</li> </ol>                                                                                                                 | 1. Satisfaction:                                                                                                                                                                                                                                                                                                                                                                                                                                                                                                                                                                                                                                                                                                                                                                                                          | These two indices are to evaluate the barriers                                                                                                                                                                     |

1  
2  
3  
4  
5  
6  
7  
8  
9  
10  
11  
12  
13  
14  
15  
16  
17  
18  
19  
20  
21  
22  
23  
24  
25  
26  
27  
28  
29  
30  
31  
32  
33  
34  
35  
36  
37  
38  
39  
40  
41  
42  
43  
44  
45  
46

|                                           |                                                                                                                                                                                                                                                                                                                                                                                                                                                                                                                                                                                                                                                                                                                                                                                                                                                                                                                                                                                                                                                 |                                                                                           |
|-------------------------------------------|-------------------------------------------------------------------------------------------------------------------------------------------------------------------------------------------------------------------------------------------------------------------------------------------------------------------------------------------------------------------------------------------------------------------------------------------------------------------------------------------------------------------------------------------------------------------------------------------------------------------------------------------------------------------------------------------------------------------------------------------------------------------------------------------------------------------------------------------------------------------------------------------------------------------------------------------------------------------------------------------------------------------------------------------------|-------------------------------------------------------------------------------------------|
| <p>2. User compliance with the system</p> | <p>Users will primarily include surgeons in the intervention arm, but nurses involved with intervention implementation will also be included, aiming for the maximum achievable sample. We will explore their unique and important perspective using questionnaire and an interview guide for the process evaluation of public health interventions and researches.<sup>28</sup> Also, we will explore participants' experiences of using the intervention resources and experiences of the study implementation. As a part of process evaluation, contextual information on initiatives to prescribe antimicrobial will be collected through a popup window at the time when a new antimicrobial order is input in the CPOE system.</p> <p>2. compliance:<br/>As a part of process evaluation, compliance with the multicomponent intervention protocols will be assessed. This will be done by evaluating the total number of times the intervention tools fail to change the physicians' decision on antimicrobial prescription over the</p> | <p>and facilitators to implementation and the use of the computer-based intervention.</p> |
|-------------------------------------------|-------------------------------------------------------------------------------------------------------------------------------------------------------------------------------------------------------------------------------------------------------------------------------------------------------------------------------------------------------------------------------------------------------------------------------------------------------------------------------------------------------------------------------------------------------------------------------------------------------------------------------------------------------------------------------------------------------------------------------------------------------------------------------------------------------------------------------------------------------------------------------------------------------------------------------------------------------------------------------------------------------------------------------------------------|-------------------------------------------------------------------------------------------|

|  |                      |  |
|--|----------------------|--|
|  | intervention period. |  |
|--|----------------------|--|

DDD=defined daily dose, defined as the assumed average maintenance dose per day for a drug used for its main indication in adults.

ICD=international classification of diseases.

CRE=Carbapenem resistant Enterobacteriaceae.

ESBL-E=extended spectrum beta-lactamase producing Enterobacteriaceae.

MRSA=methicillin-resistant Staphylococcus aureus.

VRE=vancomycin-resistant enterococci.

ICU=intensive care unit.

URL=upper range limit.

CPOE= computerized physician order entry.

1  
2  
3  
4  
5  
6  
7  
8  
9  
10  
11  
12  
13  
14  
15  
16  
17  
18  
19  
20  
21  
22  
23  
24  
25  
26  
27  
28  
29  
30  
31  
32  
33  
34  
35  
36  
37  
38  
39  
40  
41  
42  
43  
44  
45  
46  
47  
48  
49  
50  
51  
52  
53  
54  
55  
56  
57  
58  
59  
60

**FIGURE LEGEND**

**Figure 1. Flow chart of the study design.**

**Figure 2. The multicomponent, computer-based interventions in the EPIC trial.**

For peer review only

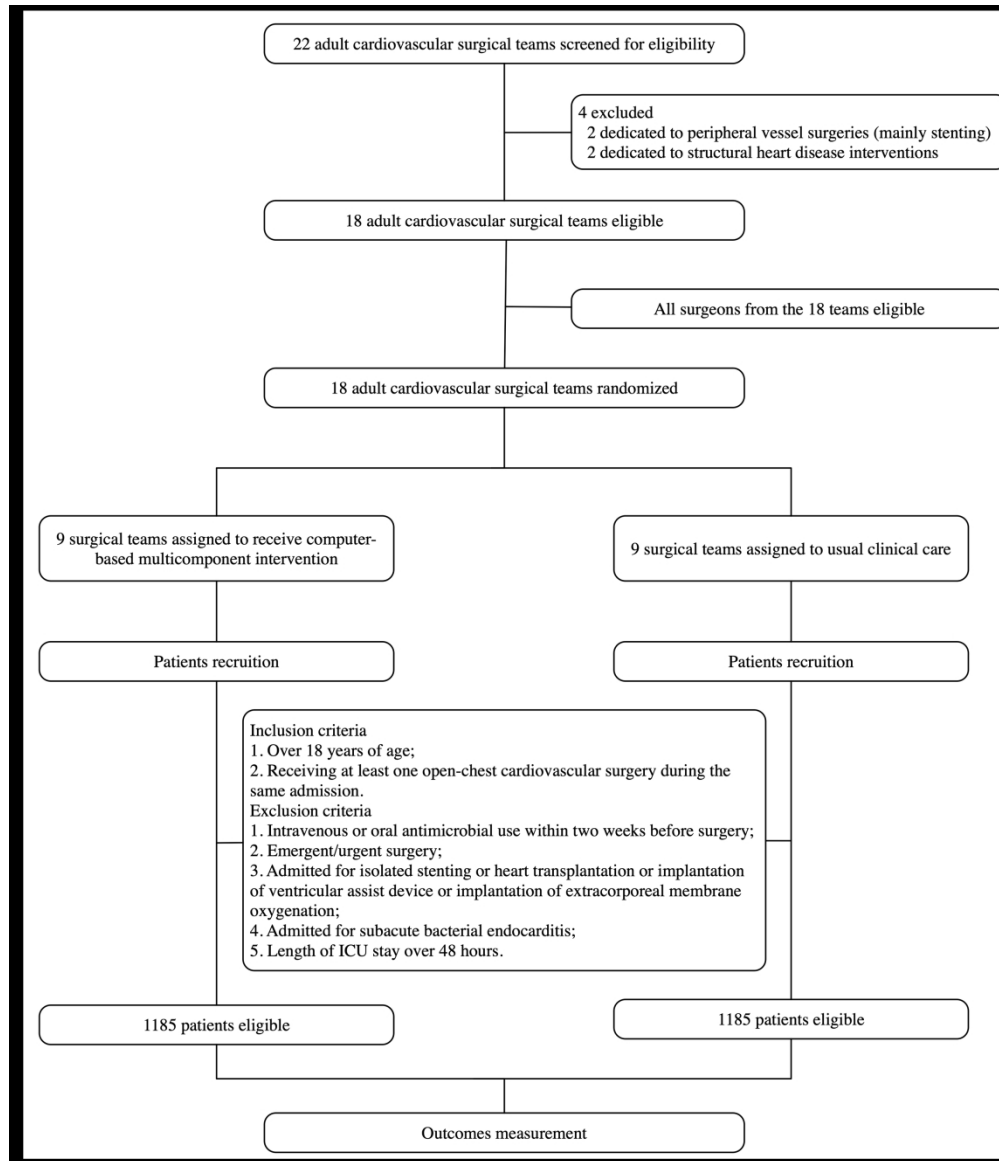

Figure 1. Flow chart of the study design.

246x286mm (300 x 300 DPI)

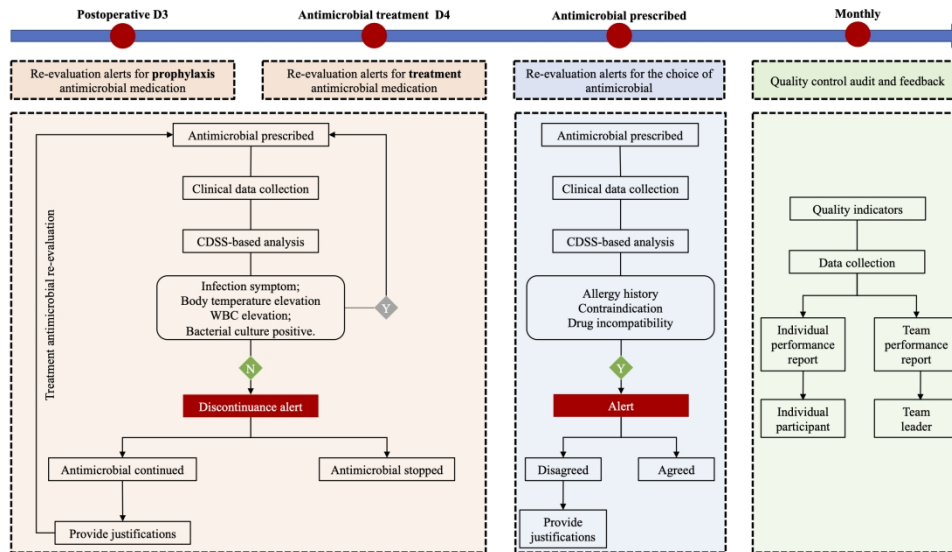

Figure 2. The multicomponent, computer-based interventions in the EPIC trial.

338x190mm (200 x 200 DPI)

# Reporting checklist for protocol of a clinical trial.

Based on the SPIRIT guidelines.

## Instructions to authors

Complete this checklist by entering the page numbers from your manuscript where readers will find each of the items listed below.

Your article may not currently address all the items on the checklist. Please modify your text to include the missing information. If you are certain that an item does not apply, please write "n/a" and provide a short explanation.

Upload your completed checklist as an extra file when you submit to a journal.

In your methods section, say that you used the SPIRIT reporting guidelines, and cite them as:

Chan A-W, Tetzlaff JM, Altman DG, Laupacis A, Gøtzsche PC, Krleža-Jerić K, Hróbjartsson A, Mann H, Dickersin K, Berlin J, Doré C, Parulekar W, Summerskill W, Groves T, Schulz K, Sox H, Rockhold FW, Rennie D, Moher D. SPIRIT 2013 Statement: Defining standard protocol items for clinical trials. *Ann Intern Med.* 2013;158(3):200-207

|                                   |                     | Reporting Item                                                                                               | Page Number |
|-----------------------------------|---------------------|--------------------------------------------------------------------------------------------------------------|-------------|
| <b>Administrative information</b> |                     |                                                                                                              |             |
| Title                             | <a href="#">#1</a>  | Descriptive title identifying the study design, population, interventions, and, if applicable, trial acronym | 1           |
| Trial registration                | <a href="#">#2a</a> | Trial identifier and registry name. If not yet registered, name of intended registry                         | 1           |
| Trial registration: data set      | <a href="#">#2b</a> | All items from the World Health Organization Trial Registration Data Set                                     | 1-2         |
| Protocol version                  | <a href="#">#3</a>  | Date and version identifier                                                                                  | 2           |
| Funding                           | <a href="#">#4</a>  | Sources and types of financial, material, and other support                                                  | 2           |
| Roles and responsibilities:       | <a href="#">#5a</a> | Names, affiliations, and roles of protocol contributors                                                      | 3-4         |



1 contributorship

2  
3 Roles and [#5b](#) Name and contact information for the trial sponsor 4  
4 responsibilities:  
5 sponsor contact  
6 information  
7  
8

9  
10 Roles and [#5c](#) Role of study sponsor and funders, if any, in study design; 4  
11 responsibilities: collection, management, analysis, and interpretation of  
12 sponsor and funder data; writing of the report; and the decision to submit the  
13 report for publication, including whether they will have  
14 ultimate authority over any of these activities  
15  
16  
17

18 Roles and [#5d](#) Composition, roles, and responsibilities of the coordinating 4-5  
19 responsibilities: centre, steering committee, endpoint adjudication  
20 committees committee, data management team, and other individuals  
21 or groups overseeing the trial, if applicable (see Item 21a  
22 for data monitoring committee)  
23  
24  
25  
26

## 27 Introduction

28  
29 Background and [#6a](#) Description of research question and justification for 5-7  
30 rationale undertaking the trial, including summary of relevant  
31 studies (published and unpublished) examining benefits  
32 and harms for each intervention  
33  
34  
35

36 Background and [#6b](#) Explanation for choice of comparators 7  
37 rationale: choice of  
38 comparators  
39  
40  
41

42 Objectives [#7](#) Specific objectives or hypotheses 7  
43

44 Trial design [#8](#) Description of trial design including type of trial (eg, 7  
45 parallel group, crossover, factorial, single group),  
46 allocation ratio, and framework (eg, superiority,  
47 equivalence, non-inferiority, exploratory)  
48  
49  
50

## 51 Methods:

### 52 Participants, 53 interventions, and 54 outcomes 55 56 57

58 Study setting [#9](#) Description of study settings (eg, community clinic, 8  
59

|    |                      |                                                                                   |       |
|----|----------------------|-----------------------------------------------------------------------------------|-------|
| 1  |                      | academic hospital) and list of countries where data will be                       |       |
| 2  |                      | collected. Reference to where list of study sites can be                          |       |
| 3  |                      | obtained                                                                          |       |
| 4  |                      |                                                                                   |       |
| 5  |                      |                                                                                   |       |
| 6  | Eligibility criteria | <a href="#">#10</a> Inclusion and exclusion criteria for participants. If         | 8-9   |
| 7  |                      | applicable, eligibility criteria for study centres and                            |       |
| 8  |                      | individuals who will perform the interventions (eg,                               |       |
| 9  |                      | surgeons, psychotherapists)                                                       |       |
| 10 |                      |                                                                                   |       |
| 11 |                      |                                                                                   |       |
| 12 |                      |                                                                                   |       |
| 13 | Interventions:       | <a href="#">#11a</a> Interventions for each group with sufficient detail to allow | 9-11  |
| 14 | description          | replication, including how and when they will be                                  |       |
| 15 |                      | administered                                                                      |       |
| 16 |                      |                                                                                   |       |
| 17 |                      |                                                                                   |       |
| 18 | Interventions:       | <a href="#">#11b</a> Criteria for discontinuing or modifying allocated            | 11    |
| 19 | modifications        | interventions for a given trial participant (eg, drug dose                        |       |
| 20 |                      | change in response to harms, participant request, or                              |       |
| 21 |                      | improving / worsening disease)                                                    |       |
| 22 |                      |                                                                                   |       |
| 23 |                      |                                                                                   |       |
| 24 |                      |                                                                                   |       |
| 25 | Interventions:       | <a href="#">#11c</a> Strategies to improve adherence to intervention protocols,   | 11-12 |
| 26 | adherence            | and any procedures for monitoring adherence (eg, drug                             |       |
| 27 |                      | tablet return; laboratory tests)                                                  |       |
| 28 |                      |                                                                                   |       |
| 29 |                      |                                                                                   |       |
| 30 |                      |                                                                                   |       |
| 31 | Interventions:       | <a href="#">#11d</a> Relevant concomitant care and interventions that are         | 12    |
| 32 | concomitant care     | permitted or prohibited during the trial                                          |       |
| 33 |                      |                                                                                   |       |
| 34 |                      |                                                                                   |       |
| 35 | Outcomes             | <a href="#">#12</a> Primary, secondary, and other outcomes, including the         | 12-14 |
| 36 |                      | specific measurement variable (eg, systolic blood                                 |       |
| 37 |                      | pressure), analysis metric (eg, change from baseline, final                       |       |
| 38 |                      | value, time to event), method of aggregation (eg, median,                         |       |
| 39 |                      | proportion), and time point for each outcome. Explanation                         |       |
| 40 |                      | of the clinical relevance of chosen efficacy and harm                             |       |
| 41 |                      | outcomes is strongly recommended                                                  |       |
| 42 |                      |                                                                                   |       |
| 43 |                      |                                                                                   |       |
| 44 |                      |                                                                                   |       |
| 45 |                      |                                                                                   |       |
| 46 |                      |                                                                                   |       |
| 47 | Participant timeline | <a href="#">#13</a> Time schedule of enrolment, interventions (including any      | 14-15 |
| 48 |                      | run-ins and washouts), assessments, and visits for                                |       |
| 49 |                      | participants. A schematic diagram is highly recommended                           |       |
| 50 |                      | (see Figure)                                                                      |       |
| 51 |                      |                                                                                   |       |
| 52 |                      |                                                                                   |       |
| 53 |                      |                                                                                   |       |
| 54 | Sample size          | <a href="#">#14</a> Estimated number of participants needed to achieve study      | 15    |
| 55 |                      | objectives and how it was determined, including clinical                          |       |
| 56 |                      | and statistical assumptions supporting any sample size                            |       |
| 57 |                      | calculations                                                                      |       |
| 58 |                      |                                                                                   |       |
| 59 |                      |                                                                                   |       |
| 60 |                      |                                                                                   |       |

|    |                           |                      |                                                                                                                                                                                                                                                                                                                                                          |       |
|----|---------------------------|----------------------|----------------------------------------------------------------------------------------------------------------------------------------------------------------------------------------------------------------------------------------------------------------------------------------------------------------------------------------------------------|-------|
| 1  | Recruitment               | <a href="#">#15</a>  | Strategies for achieving adequate participant enrolment to reach target sample size                                                                                                                                                                                                                                                                      | 15    |
| 2  |                           |                      |                                                                                                                                                                                                                                                                                                                                                          |       |
| 3  |                           |                      |                                                                                                                                                                                                                                                                                                                                                          |       |
| 4  |                           |                      |                                                                                                                                                                                                                                                                                                                                                          |       |
| 5  | <b>Methods:</b>           |                      |                                                                                                                                                                                                                                                                                                                                                          |       |
| 6  | <b>Assignment of</b>      |                      |                                                                                                                                                                                                                                                                                                                                                          |       |
| 7  | <b>interventions (for</b> |                      |                                                                                                                                                                                                                                                                                                                                                          |       |
| 8  | <b>controlled trials)</b> |                      |                                                                                                                                                                                                                                                                                                                                                          |       |
| 9  |                           |                      |                                                                                                                                                                                                                                                                                                                                                          |       |
| 10 |                           |                      |                                                                                                                                                                                                                                                                                                                                                          |       |
| 11 |                           |                      |                                                                                                                                                                                                                                                                                                                                                          |       |
| 12 | Allocation: sequence      | <a href="#">#16a</a> | Method of generating the allocation sequence (eg, computer-generated random numbers), and list of any factors for stratification. To reduce predictability of a random sequence, details of any planned restriction (eg, blocking) should be provided in a separate document that is unavailable to those who enrol participants or assign interventions | 16    |
| 13 | generation                |                      |                                                                                                                                                                                                                                                                                                                                                          |       |
| 14 |                           |                      |                                                                                                                                                                                                                                                                                                                                                          |       |
| 15 |                           |                      |                                                                                                                                                                                                                                                                                                                                                          |       |
| 16 |                           |                      |                                                                                                                                                                                                                                                                                                                                                          |       |
| 17 |                           |                      |                                                                                                                                                                                                                                                                                                                                                          |       |
| 18 |                           |                      |                                                                                                                                                                                                                                                                                                                                                          |       |
| 19 |                           |                      |                                                                                                                                                                                                                                                                                                                                                          |       |
| 20 |                           |                      |                                                                                                                                                                                                                                                                                                                                                          |       |
| 21 |                           |                      |                                                                                                                                                                                                                                                                                                                                                          |       |
| 22 |                           |                      |                                                                                                                                                                                                                                                                                                                                                          |       |
| 23 |                           |                      |                                                                                                                                                                                                                                                                                                                                                          |       |
| 24 | Allocation                | <a href="#">#16b</a> | Mechanism of implementing the allocation sequence (eg, central telephone; sequentially numbered, opaque, sealed envelopes), describing any steps to conceal the sequence until interventions are assigned                                                                                                                                                | 16    |
| 25 | concealment               |                      |                                                                                                                                                                                                                                                                                                                                                          |       |
| 26 | mechanism                 |                      |                                                                                                                                                                                                                                                                                                                                                          |       |
| 27 |                           |                      |                                                                                                                                                                                                                                                                                                                                                          |       |
| 28 |                           |                      |                                                                                                                                                                                                                                                                                                                                                          |       |
| 29 |                           |                      |                                                                                                                                                                                                                                                                                                                                                          |       |
| 30 |                           |                      |                                                                                                                                                                                                                                                                                                                                                          |       |
| 31 | Allocation:               | <a href="#">#16c</a> | Who will generate the allocation sequence, who will enrol participants, and who will assign participants to interventions                                                                                                                                                                                                                                | 16    |
| 32 | implementation            |                      |                                                                                                                                                                                                                                                                                                                                                          |       |
| 33 |                           |                      |                                                                                                                                                                                                                                                                                                                                                          |       |
| 34 |                           |                      |                                                                                                                                                                                                                                                                                                                                                          |       |
| 35 |                           |                      |                                                                                                                                                                                                                                                                                                                                                          |       |
| 36 | Blinding (masking)        | <a href="#">#17a</a> | Who will be blinded after assignment to interventions (eg, trial participants, care providers, outcome assessors, data analysts), and how                                                                                                                                                                                                                | 16-17 |
| 37 |                           |                      |                                                                                                                                                                                                                                                                                                                                                          |       |
| 38 |                           |                      |                                                                                                                                                                                                                                                                                                                                                          |       |
| 39 |                           |                      |                                                                                                                                                                                                                                                                                                                                                          |       |
| 40 |                           |                      |                                                                                                                                                                                                                                                                                                                                                          |       |
| 41 |                           |                      |                                                                                                                                                                                                                                                                                                                                                          |       |
| 42 | Blinding (masking):       | <a href="#">#17b</a> | If blinded, circumstances under which unblinding is permissible, and procedure for revealing a participant's allocated intervention during the trial                                                                                                                                                                                                     | 17    |
| 43 | emergency unblinding      |                      |                                                                                                                                                                                                                                                                                                                                                          |       |
| 44 |                           |                      |                                                                                                                                                                                                                                                                                                                                                          |       |
| 45 |                           |                      |                                                                                                                                                                                                                                                                                                                                                          |       |
| 46 |                           |                      |                                                                                                                                                                                                                                                                                                                                                          |       |
| 47 | <b>Methods: Data</b>      |                      |                                                                                                                                                                                                                                                                                                                                                          |       |
| 48 | <b>collection,</b>        |                      |                                                                                                                                                                                                                                                                                                                                                          |       |
| 49 | <b>management, and</b>    |                      |                                                                                                                                                                                                                                                                                                                                                          |       |
| 50 | <b>analysis</b>           |                      |                                                                                                                                                                                                                                                                                                                                                          |       |
| 51 |                           |                      |                                                                                                                                                                                                                                                                                                                                                          |       |
| 52 |                           |                      |                                                                                                                                                                                                                                                                                                                                                          |       |
| 53 |                           |                      |                                                                                                                                                                                                                                                                                                                                                          |       |
| 54 | Data collection plan      | <a href="#">#18a</a> | Plans for assessment and collection of outcome, baseline, and other trial data, including any related processes to promote data quality (eg, duplicate measurements,                                                                                                                                                                                     | 17    |
| 55 |                           |                      |                                                                                                                                                                                                                                                                                                                                                          |       |
| 56 |                           |                      |                                                                                                                                                                                                                                                                                                                                                          |       |
| 57 |                           |                      |                                                                                                                                                                                                                                                                                                                                                          |       |
| 58 |                           |                      |                                                                                                                                                                                                                                                                                                                                                          |       |
| 59 |                           |                      |                                                                                                                                                                                                                                                                                                                                                          |       |
| 60 |                           |                      |                                                                                                                                                                                                                                                                                                                                                          |       |

training of assessors) and a description of study instruments (eg, questionnaires, laboratory tests) along with their reliability and validity, if known. Reference to where data collection forms can be found, if not in the protocol

|    |                            |                      |                                                                |
|----|----------------------------|----------------------|----------------------------------------------------------------|
| 1  |                            |                      |                                                                |
| 2  |                            |                      |                                                                |
| 3  |                            |                      |                                                                |
| 4  |                            |                      |                                                                |
| 5  |                            |                      |                                                                |
| 6  |                            |                      |                                                                |
| 7  |                            |                      |                                                                |
| 8  |                            |                      |                                                                |
| 9  | Data collection plan:      | <a href="#">#18b</a> | Plans to promote participant retention and complete            |
| 10 | retention                  |                      | follow-up, including list of any outcome data to be            |
| 11 |                            |                      | collected for participants who discontinue or deviate from     |
| 12 |                            |                      | intervention protocols                                         |
| 13 |                            |                      |                                                                |
| 14 |                            |                      |                                                                |
| 15 |                            |                      |                                                                |
| 16 | Data management            | <a href="#">#19</a>  | Plans for data entry, coding, security, and storage,           |
| 17 |                            |                      | including any related processes to promote data quality        |
| 18 |                            |                      | (eg, double data entry; range checks for data values).         |
| 19 |                            |                      | Reference to where details of data management                  |
| 20 |                            |                      | procedures can be found, if not in the protocol                |
| 21 |                            |                      |                                                                |
| 22 |                            |                      |                                                                |
| 23 |                            |                      |                                                                |
| 24 | Statistics: outcomes       | <a href="#">#20a</a> | Statistical methods for analysing primary and secondary        |
| 25 |                            |                      | outcomes. Reference to where other details of the              |
| 26 |                            |                      | statistical analysis plan can be found, if not in the protocol |
| 27 |                            |                      |                                                                |
| 28 |                            |                      |                                                                |
| 29 |                            |                      |                                                                |
| 30 | Statistics: additional     | <a href="#">#20b</a> | Methods for any additional analyses (eg, subgroup and          |
| 31 | analyses                   |                      | adjusted analyses)                                             |
| 32 |                            |                      |                                                                |
| 33 |                            |                      |                                                                |
| 34 | Statistics: analysis       | <a href="#">#20c</a> | Definition of analysis population relating to protocol non-    |
| 35 | population and             |                      | adherence (eg, as randomised analysis), and any                |
| 36 | missing data               |                      | statistical methods to handle missing data (eg, multiple       |
| 37 |                            |                      | imputation)                                                    |
| 38 |                            |                      |                                                                |
| 39 |                            |                      |                                                                |
| 40 |                            |                      |                                                                |
| 41 | <b>Methods: Monitoring</b> |                      |                                                                |
| 42 |                            |                      |                                                                |
| 43 | Data monitoring:           | <a href="#">#21a</a> | Composition of data monitoring committee (DMC);                |
| 44 | formal committee           |                      | summary of its role and reporting structure; statement of      |
| 45 |                            |                      | whether it is independent from the sponsor and competing       |
| 46 |                            |                      | interests; and reference to where further details about its    |
| 47 |                            |                      | charter can be found, if not in the protocol. Alternatively,   |
| 48 |                            |                      | an explanation of why a DMC is not needed                      |
| 49 |                            |                      |                                                                |
| 50 |                            |                      |                                                                |
| 51 |                            |                      |                                                                |
| 52 |                            |                      |                                                                |
| 53 |                            |                      |                                                                |
| 54 | Data monitoring:           | <a href="#">#21b</a> | Description of any interim analyses and stopping               |
| 55 | interim analysis           |                      | guidelines, including who will have access to these interim    |
| 56 |                            |                      | results and make the final decision to terminate the trial     |
| 57 |                            |                      |                                                                |
| 58 |                            |                      |                                                                |
| 59 |                            |                      |                                                                |
| 60 |                            |                      |                                                                |

|    |                          |                      |                                                                |       |
|----|--------------------------|----------------------|----------------------------------------------------------------|-------|
| 1  | Harms                    | <a href="#">#22</a>  | Plans for collecting, assessing, reporting, and managing       | 21    |
| 2  |                          |                      | solicited and spontaneously reported adverse events and        |       |
| 3  |                          |                      | other unintended effects of trial interventions or trial       |       |
| 4  |                          |                      | conduct                                                        |       |
| 5  |                          |                      |                                                                |       |
| 6  |                          |                      |                                                                |       |
| 7  |                          |                      |                                                                |       |
| 8  | Auditing                 | <a href="#">#23</a>  | Frequency and procedures for auditing trial conduct, if        | 22    |
| 9  |                          |                      | any, and whether the process will be independent from          |       |
| 10 |                          |                      | investigators and the sponsor                                  |       |
| 11 |                          |                      |                                                                |       |
| 12 |                          |                      |                                                                |       |
| 13 |                          |                      |                                                                |       |
| 14 | <b>Ethics and</b>        |                      |                                                                |       |
| 15 | <b>dissemination</b>     |                      |                                                                |       |
| 16 |                          |                      |                                                                |       |
| 17 | Research ethics          | <a href="#">#24</a>  | Plans for seeking research ethics committee / institutional    | 22    |
| 18 | approval                 |                      | review board (REC / IRB) approval                              |       |
| 19 |                          |                      |                                                                |       |
| 20 |                          |                      |                                                                |       |
| 21 | Protocol amendments      | <a href="#">#25</a>  | Plans for communicating important protocol modifications       | 22-23 |
| 22 |                          |                      | (eg, changes to eligibility criteria, outcomes, analyses) to   |       |
| 23 |                          |                      | relevant parties (eg, investigators, REC / IRBs, trial         |       |
| 24 |                          |                      | participants, trial registries, journals, regulators)          |       |
| 25 |                          |                      |                                                                |       |
| 26 |                          |                      |                                                                |       |
| 27 |                          |                      |                                                                |       |
| 28 | Consent or assent        | <a href="#">#26a</a> | Who will obtain informed consent or assent from potential      | 23    |
| 29 |                          |                      | trial participants or authorised surrogates, and how (see      |       |
| 30 |                          |                      | Item 32)                                                       |       |
| 31 |                          |                      |                                                                |       |
| 32 |                          |                      |                                                                |       |
| 33 |                          |                      |                                                                |       |
| 34 | Consent or assent:       | <a href="#">#26b</a> | Additional consent provisions for collection and use of        | 23    |
| 35 | ancillary studies        |                      | participant data and biological specimens in ancillary         |       |
| 36 |                          |                      | studies, if applicable                                         |       |
| 37 |                          |                      |                                                                |       |
| 38 |                          |                      |                                                                |       |
| 39 | Confidentiality          | <a href="#">#27</a>  | How personal information about potential and enrolled          | 23    |
| 40 |                          |                      | participants will be collected, shared, and maintained in      |       |
| 41 |                          |                      | order to protect confidentiality before, during, and after the |       |
| 42 |                          |                      | trial                                                          |       |
| 43 |                          |                      |                                                                |       |
| 44 |                          |                      |                                                                |       |
| 45 |                          |                      |                                                                |       |
| 46 | Declaration of           | <a href="#">#28</a>  | Financial and other competing interests for principal          | 24    |
| 47 | interests                |                      | investigators for the overall trial and each study site        |       |
| 48 |                          |                      |                                                                |       |
| 49 |                          |                      |                                                                |       |
| 50 | Data access              | <a href="#">#29</a>  | Statement of who will have access to the final trial dataset,  | 24    |
| 51 |                          |                      | and disclosure of contractual agreements that limit such       |       |
| 52 |                          |                      | access for investigators                                       |       |
| 53 |                          |                      |                                                                |       |
| 54 |                          |                      |                                                                |       |
| 55 |                          |                      |                                                                |       |
| 56 | Ancillary and post trial | <a href="#">#30</a>  | Provisions, if any, for ancillary and post-trial care, and for | 24    |
| 57 | care                     |                      | compensation to those who suffer harm from trial               |       |
| 58 |                          |                      |                                                                |       |
| 59 |                          |                      |                                                                |       |
| 60 |                          |                      |                                                                |       |

participation

|    |                       |                      |                                                                 |
|----|-----------------------|----------------------|-----------------------------------------------------------------|
| 1  |                       |                      |                                                                 |
| 2  |                       |                      |                                                                 |
| 3  | Dissemination policy: | <a href="#">#31a</a> | Plans for investigators and sponsor to communicate trial        |
| 4  | trial results         |                      | results to participants, healthcare professionals, the public,  |
| 5  |                       |                      | and other relevant groups (eg, via publication, reporting in    |
| 6  |                       |                      | results databases, or other data sharing arrangements),         |
| 7  |                       |                      | including any publication restrictions                          |
| 8  |                       |                      |                                                                 |
| 9  |                       |                      |                                                                 |
| 10 |                       |                      |                                                                 |
| 11 | Dissemination policy: | <a href="#">#31b</a> | Authorship eligibility guidelines and any intended use of       |
| 12 | authorship            |                      | professional writers                                            |
| 13 |                       |                      |                                                                 |
| 14 |                       |                      |                                                                 |
| 15 | Dissemination policy: | <a href="#">#31c</a> | Plans, if any, for granting public access to the full protocol, |
| 16 | reproducible research |                      | participant-level dataset, and statistical code                 |
| 17 |                       |                      |                                                                 |
| 18 |                       |                      |                                                                 |

## Appendices

|    |                      |                     |                                                               |
|----|----------------------|---------------------|---------------------------------------------------------------|
| 19 |                      |                     |                                                               |
| 20 |                      |                     |                                                               |
| 21 | Informed consent     | <a href="#">#32</a> | Model consent form and other related documentation            |
| 22 | materials            |                     | given to participants and authorised surrogates               |
| 23 |                      |                     |                                                               |
| 24 |                      |                     |                                                               |
| 25 | Biological specimens | <a href="#">#33</a> | Plans for collection, laboratory evaluation, and storage of   |
| 26 |                      |                     | biological specimens for genetic or molecular analysis in     |
| 27 |                      |                     | the current trial and for future use in ancillary studies, if |
| 28 |                      |                     | applicable                                                    |
| 29 |                      |                     |                                                               |
| 30 |                      |                     |                                                               |
| 31 |                      |                     |                                                               |

32 None The SPIRIT checklist is distributed under the terms of the Creative Commons Attribution  
 33 License CC-BY-ND 3.0. This checklist can be completed online using <https://www.goodreports.org/>, a  
 34 tool made by the [EQUATOR Network](#) in collaboration with [Penelope.ai](#)  
 35  
 36  
 37  
 38  
 39  
 40  
 41  
 42  
 43  
 44  
 45  
 46  
 47  
 48  
 49  
 50  
 51  
 52  
 53  
 54  
 55  
 56  
 57  
 58  
 59  
 60

# BMJ Open

**An open-label, single-centre, cluster-randomized, controlled trial to Evaluate the Potential Impact of Computerized antimicrobial stewardship (EPIC) on the antimicrobial use after cardiovascular surgeries: EPIC trial study original protocol**

|                                 |                                                                                                                                                                                                                                                                                                                                                                                                                                                                                                                                                                                                                                                                                                                                                                                                                                                                                               |
|---------------------------------|-----------------------------------------------------------------------------------------------------------------------------------------------------------------------------------------------------------------------------------------------------------------------------------------------------------------------------------------------------------------------------------------------------------------------------------------------------------------------------------------------------------------------------------------------------------------------------------------------------------------------------------------------------------------------------------------------------------------------------------------------------------------------------------------------------------------------------------------------------------------------------------------------|
| Journal:                        | <i>BMJ Open</i>                                                                                                                                                                                                                                                                                                                                                                                                                                                                                                                                                                                                                                                                                                                                                                                                                                                                               |
| Manuscript ID                   | bmjopen-2020-039717.R1                                                                                                                                                                                                                                                                                                                                                                                                                                                                                                                                                                                                                                                                                                                                                                                                                                                                        |
| Article Type:                   | Protocol                                                                                                                                                                                                                                                                                                                                                                                                                                                                                                                                                                                                                                                                                                                                                                                                                                                                                      |
| Date Submitted by the Author:   | 20-Aug-2020                                                                                                                                                                                                                                                                                                                                                                                                                                                                                                                                                                                                                                                                                                                                                                                                                                                                                   |
| Complete List of Authors:       | Yuan, Xin; Chinese Academy of Medical Sciences & Peking Union Medical College Fuwai Hospital<br>Chen, Kai; Chinese Academy of Medical Sciences & Peking Union Medical College Fuwai Hospital,<br>Zhao, Wei; Chinese Academy of Medical Sciences & Peking Union Medical College Fuwai Hospital, Information Centre<br>Hu, Shuang; Chinese Academy of Medical Sciences & Peking Union Medical College Fuwai Hospital<br>Yu, Fei; Chinese Academy of Medical Sciences & Peking Union Medical College Fuwai Hospital, Information centre<br>Diao, Xiaolin; Chinese Academy of Medical Sciences & Peking Union Medical College Fuwai Hospital, Information centre<br>Chen, Xingwei; Chinese Academy of Medical Sciences & Peking Union Medical College Fuwai Hospital, Department of pharmacy<br>Hu, Shengshou ; Chinese Academy of Medical Sciences & Peking Union Medical College Fuwai Hospital |
| <b>Primary Subject Heading</b>: | Medical management                                                                                                                                                                                                                                                                                                                                                                                                                                                                                                                                                                                                                                                                                                                                                                                                                                                                            |
| Secondary Subject Heading:      | Cardiovascular medicine, Medical management, Surgery                                                                                                                                                                                                                                                                                                                                                                                                                                                                                                                                                                                                                                                                                                                                                                                                                                          |
| Keywords:                       | Cardiac surgery < SURGERY, Adult cardiology < CARDIOLOGY, Clinical trials < THERAPEUTICS                                                                                                                                                                                                                                                                                                                                                                                                                                                                                                                                                                                                                                                                                                                                                                                                      |
|                                 |                                                                                                                                                                                                                                                                                                                                                                                                                                                                                                                                                                                                                                                                                                                                                                                                                                                                                               |

SCHOLARONE™  
Manuscripts

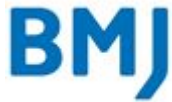

I, the Submitting Author has the right to grant and does grant on behalf of all authors of the Work (as defined in the below author licence), an exclusive licence and/or a non-exclusive licence for contributions from authors who are: i) UK Crown employees; ii) where BMJ has agreed a CC-BY licence shall apply, and/or iii) in accordance with the terms applicable for US Federal Government officers or employees acting as part of their official duties; on a worldwide, perpetual, irrevocable, royalty-free basis to BMJ Publishing Group Ltd ("BMJ") its licensees and where the relevant Journal is co-owned by BMJ to the co-owners of the Journal, to publish the Work in this journal and any other BMJ products and to exploit all rights, as set out in our [licence](#).

The Submitting Author accepts and understands that any supply made under these terms is made by BMJ to the Submitting Author unless you are acting as an employee on behalf of your employer or a postgraduate student of an affiliated institution which is paying any applicable article publishing charge ("APC") for Open Access articles. Where the Submitting Author wishes to make the Work available on an Open Access basis (and intends to pay the relevant APC), the terms of reuse of such Open Access shall be governed by a Creative Commons licence – details of these licences and which [Creative Commons](#) licence will apply to this Work are set out in our licence referred to above.

Other than as permitted in any relevant BMJ Author's Self Archiving Policies, I confirm this Work has not been accepted for publication elsewhere, is not being considered for publication elsewhere and does not duplicate material already published. I confirm all authors consent to publication of this Work and authorise the granting of this licence.



Aug 18, 2020

Revised

*Protocol*

**An open-label, single-centre, cluster-randomized, controlled trial to Evaluate the Potential Impact of Computerized antimicrobial stewardship (EPIC) on the antimicrobial use after cardiovascular surgeries: EPIC trial study original protocol**

*Short title: Study protocol for EPIC*

Xin Yuan,<sup>1, 2\*</sup> MD, PhD, Kai Chen,<sup>1, 2\*</sup> MD, PhD, Wei Zhao,<sup>3</sup> PhD, Shuang Hu,<sup>4</sup> PhD, Fei Yu,<sup>3</sup> BS, Xiaolin Diao,<sup>3</sup> MS, Xingwei Chen,<sup>5</sup> MS, Shengshou Hu,<sup>1, 2</sup> MD

<sup>1</sup> State Key Laboratory of Cardiovascular Disease, Fuwai Hospital, National Centre for Cardiovascular Diseases, Chinese Academy of Medical Sciences and Peking Union Medical College, Beijing, China.

<sup>2</sup> Department of Cardiac Surgery, Fuwai Hospital, Chinese Academy of Medical Science and Peking Union Medical College, Beijing, China.

<sup>3</sup> Information Centre, Fuwai Hospital, Chinese Academy of Medical Science and Peking Union Medical College, Beijing, China.

<sup>4</sup> National Clinical Research Centre of Cardiovascular Diseases, State Key Laboratory of Cardiovascular Disease, Fuwai Hospital, National Centre for Cardiovascular Diseases, Chinese Academy of Medical Sciences and Peking Union Medical College, Beijing, China.

<sup>5</sup> Department of Pharmacy, Fuwai Hospital, Chinese Academy of Medical Science and Peking Union Medical College, Beijing, China.

\*These two authors contributed equally to this work as the first authors

Word count: 3250

Address for Correspondence:

1  
2  
3  
4 Shengshou Hu, MD  
5

6 Fuwai Hospital, Peking Union Medical College  
7

8  
9 167 Beilishi Road, Xicheng District, Beijing, P.R. China  
10

11 Email: huss@fuwaihospital.org  
12  
13  
14  
15  
16  
17  
18  
19  
20  
21  
22  
23  
24  
25  
26  
27  
28  
29  
30  
31  
32  
33  
34  
35  
36  
37  
38  
39  
40  
41  
42  
43  
44  
45  
46  
47  
48  
49  
50  
51  
52  
53  
54  
55  
56  
57  
58  
59  
60

For peer review only

## ABSTRACT

### Introduction

Inappropriate antimicrobial use increases the prevalence of antimicrobial resistant bacteria. Surgeons are reluctant to implement recommendations of guidelines in clinical practice. Antimicrobial stewardship (AMS) is effective in antimicrobial management, but it remains labour intensive. The computerized decision support system (CDSS) has been identified as an effective way to enable key elements of AMS in clinical settings. However, insufficient evidence is available to evaluate the efficacy of computerized AMS in surgical settings.

### Methods and analysis

The Evaluate of the Potential Impact of Computerized antimicrobial stewardship (EPIC) trial is an open-label, single-centre, two-arm, cluster-randomized, controlled trial, which aims to determine whether a multicomponent CDSS intervention reduces overall antimicrobial use after cardiovascular surgeries compared with usual clinical care in a specialty hospital with a big volume of cardiovascular surgeries. Eighteen cardiovascular surgical teams will be randomized 1:1 to either the intervention or the control arm. The intervention will consist of (1) re-evaluation alerts and decision support for the duration of antimicrobial treatment decision, (2) re-evaluation alerts and decision support for the choice of antimicrobial, (3) quality control audit and feedback. The primary outcome will be the overall systemic antimicrobial use measured in days of therapy (DOT) per admission and DOT per 1000 patient-days over the whole intervention period (six months). Secondary outcomes include a series of indices to

1  
2  
3 evaluate antimicrobial use, microbial resistance, perioperative infection outcomes,  
4  
5 patient safety, resource consumption, and user compliance and satisfaction.  
6  
7

### 8 9 **Ethics and dissemination**

10  
11  
12 The Ethics Committee in Fuwai hospital approved this study (2020-1329). The results  
13  
14 of the trial will be submitted for publication in a peer-reviewed journal.  
15  
16

17  
18 **Trial registration number:** NCT04328090.  
19  
20

### 21 22 **Key words**

23  
24 Antimicrobial stewardship; computerized decision support system; cardiovascular  
25  
26 surgery; randomized controlled trial.  
27  
28  
29  
30  
31  
32  
33  
34  
35  
36  
37  
38  
39  
40  
41  
42  
43  
44  
45  
46  
47  
48  
49  
50  
51  
52  
53  
54  
55  
56  
57  
58  
59  
60

### Strengths and limitations of this study

1. This adequately powered, cluster-randomized, controlled trial addresses many inadequacies in designs of the previous studies.
2. Different from previous studies in terms of the scope, setting and timing, the EPIC trial is among the first to assess the impact of CDSS tools on antimicrobial use in hospital settings.
3. To the best of our knowledge, this trial will be one of the first trials carried out in surgery settings.
4. This trial is a single centre study which may increase type II error.

## INTRODUCTION

Antimicrobial drug resistance among common bacterial pathogens has become a global health crisis.<sup>1-3</sup> It is reported that more than two million illnesses and 23,000 deaths are caused by antimicrobial resistant bacteria in the United States in 2017.<sup>4</sup> This crisis is even more serious in low to middle income countries.<sup>5</sup>

Inappropriate antimicrobial use after surgeries increases the prevalence of antimicrobial resistant bacteria and subsequently unnecessary risk of adverse drug events to patients as well as loads heavy economic burden on the healthcare system.<sup>6 7</sup> Despite many published guidelines of antimicrobial use and decades of efforts to change prescribing patterns, a survey revealed that the practice of antimicrobial use varies substantially among surgeons.<sup>8</sup> Furthermore, studies have shown that surgeons are reluctant to implement recommendations of guidelines in their regular clinical practice.<sup>9 10</sup> Therefore, interventions to standardize surgeons' practice of antimicrobial use is highly important.

Antimicrobial stewardship (AMS), the primary goal of which is to optimize antimicrobial use, has been proven to be effective to improve surgical outcomes with increasing evidence.<sup>11-13</sup> However, as the idea becomes more widespread, implementing AMS remains a big challenge. Most of the AMS interventions require manual assessment and are best served by the expertise of infectious disease physicians or clinical pharmacists. The labour-intensive nature has impeded AMS implementation on a large and sustainable scale.<sup>14 15</sup> Under circumstances where the important personnel are not adequate, computerized decision support system (CDSS) has been identified as one way to enable key elements of AMS in clinical settings.

However, little evidence support the application of CDSS in the AMS system in

1  
2  
3 surgical settings. The controlled before-after and non-randomized study design in the  
4 related studies may lead to bias and reduce the validity of causal inference.<sup>16</sup> In addition,  
5 previous studies mainly focused on the primary care and little high-quality studies  
6 assessed the computer-based intervention for the in-hospital antimicrobial use in both  
7 surgical and non-surgical settings.<sup>17-19</sup> Therefore, based on the moderate-quality  
8 evidence in the literature, the 2016 AMS guidelines by the Infectious Diseases Society  
9 of America and the Society for Healthcare Epidemiology of America gave “weak  
10 recommendation” on the integration of CDSS into AMS programs.<sup>20</sup>

11  
12 To address this evidence gap, we planned to start a cluster-randomized trial in the  
13 largest cardiovascular surgery specialty hospital in China. We chose cardiovascular  
14 surgery rather than other surgical procedures because surgical site infections (SSIs)  
15 associated with cardiovascular surgeries is particularly severe; moreover,  
16 cardiovascular surgery-related SSIs are typically associated with skin flora and thus the  
17 evidence from this population may have significance for other surgical procedures.<sup>21-26</sup>

18  
19 The EPIC trial aims to assess if a multicomponent computer-based system incorporated  
20 into the workflow will reduce days of therapy (DOT) per admission and DOT per 1000  
21 patient-day after cardiovascular surgeries in the intervention surgical teams compared  
22 to the controlled surgical teams, over a six-month period.

## 23 24 25 **METHODS/DESIGN**

26  
27 This trial is an open-label, two-arm, cluster-randomized, controlled trial with  
28 cardiovascular surgical teams as the unit of randomization (Figure 1, flow chart).<sup>27</sup>  
29 Eligible teams (as defined in “Inclusion/exclusion criteria” section) with written  
30 consent are randomized to the intervention or control arm by using an interactive web  
31 response system. The computer-based, multicomponent intervention targeting the  
32

1  
2  
3 reduction of perioperative antimicrobial use will be delivered to the intervention teams  
4  
5 and the control teams will keep the usual clinical care.  
6  
7

8  
9 A trial steering committee has been set up to monitor the conduct of the trial and the  
10  
11 management of the data. Members of the trial steering committee will meet throughout  
12  
13 the study period. The committee will include research staff, a clinical pharmacist, and  
14  
15 two surgeons who are not directly involved in the trial.  
16  
17

### 18 19 **Study setting**

20  
21  
22 The study will be launched in Fuwai Hospital, a 1500-bed tertiary care medical centre  
23  
24 with an annual cardiovascular surgery volume of approximately 15,000 cases. Twenty-  
25  
26 two surgical teams led by paid specialists in Fuwai perform approximately 10,000  
27  
28 various cardiovascular surgeries independently for adult patients (over 18 years old).  
29  
30

31  
32 Fuwai has deployed an in-house electronic medical record (EMR) system and a  
33  
34 computerized physician order entry (CPOE) system since 2009. All surgical teams fulfil  
35  
36 the function of medical record management and physician order entry by using the in-  
37  
38 house EMR and CPOE systems.  
39  
40

### 41 42 **Inclusion/exclusion criteria**

43  
44  
45 At the cluster level, eighteen adult cardiovascular surgical teams in Fuwai Hospital will  
46  
47 be invited to participate in this trial. Two surgical teams dedicated to peripheral vessel  
48  
49 surgeries (mainly stenting) and two dedicated to structural heart disease interventions,  
50  
51 which performed operations without opening the chest, are excluded because of their  
52  
53 different AMS protocols.  
54  
55

56  
57  
58 At the physician level, the participants are the surgeons who prescribe antimicrobial to  
59  
60



1  
2  
3 patients in the surgical teams.  
4  
5

6 At the patient level, the inclusion criteria are: 1. Over 18 years of age; 2. Receiving at  
7 least one open-chest cardiovascular surgery during the same admission. The exclusion  
8 criteria are: 1. Intravenous or oral antimicrobial use within two weeks before surgery;  
9 2. Emergent/urgent surgery; 3. Admitted for isolated stenting, heart transplantation or  
10 implantation of ventricular assist device, or implantation of extracorporeal membrane  
11 oxygenation; 4. Admitted for subacute bacterial endocarditis; 5. Length of ICU stay  
12 over 48 hours.  
13  
14  
15  
16  
17  
18  
19  
20  
21  
22

### 23 **AMS intervention**

#### 24 AMS protocol in Fuwai Hospital

25  
26  
27 The development of AMS program in Fuwai Hospital is based on previous guidelines  
28 as well as local policies.<sup>20 28-31</sup> The program is multifunctional with the review of all  
29 positive blood cultures, regular teaching sessions for physicians, and internal/external  
30 audit of antimicrobial use and resistance. The program is regularly updated according  
31 to antimicrobial prescribing guidelines.  
32  
33  
34  
35  
36  
37  
38  
39  
40  
41

42 Briefly, a bundled intervention is implemented in regular workflow and comprises: 1.  
43 preoperative screening and decolonization; 2. an infusion of antimicrobial 30-60  
44 minutes before incision; 3. intraoperative redosing if the duration of the procedure  
45 exceeds three hours or two half-lives of the antimicrobial or there is excessive blood  
46 loss (mainly aortic surgeries); 4. A duration of antimicrobial prophylaxis less than 48  
47 hours at the postoperative stage; 5. Evaluation of microbiological findings,  
48 appropriateness of antimicrobial therapy, and de-escalation strategies at the  
49 postoperative stage.  
50  
51  
52  
53  
54  
55  
56  
57  
58  
59  
60

## Computer based AMS intervention system

The intervention in the EPIC trial targets the control of postoperative antimicrobial use. The development of the computer-based multicomponent intervention is informed by existing medical records, behavioural intervention theory, systematic review evidence, qualitative research with trial and non-trial practices, clinical guidelines, and national policies.<sup>18-20 28-33</sup>

The computer based AMS intervention system was set up based on the EMR and CPOE system on the server of Information Centre, which could access all the information from the EMR and CPOE system in real time. The computer-based evaluation will be activated at the time of the entry of antimicrobial order in the CPOE system. Popup banners, in a man-machine interactive manner, will appear in the centre of the screen to inform the physicians if violation against AMS rules is detected. General information about AMS rules will be provided as information buttons on the lower right corner of the screen. The interventions function in three domains (Figure 2):

- Re-evaluation alerts and decision support for the duration of antimicrobial treatment:

For prophylaxis use:

On postoperative calendar day three, a visual alert will routinely appear on the CPOE screen to remind the physicians to stop antimicrobial prophylaxis.

To be noted, the system will assess patient-specific data such as clinical manifestations, routine blood tests, chest x-ray, microbiological results and use of other medications within the first two postoperative days. If there are no signs of infection, discontinuance reminder will appear even if the duration of

1  
2  
3 the antimicrobial prophylaxis treatment doesn't reach two days.  
4  
5

6 For treatment use:  
7  
8

9  
10 The same method for postoperative antimicrobial treatment (with signs of  
11 postoperative infection) will be applied. Alert will appear on the calendar day  
12 six of the treatment. Discontinuance alert, on the basis of clinical data, will  
13 appear on any day before calendar day six if there are no signs of infection.  
14  
15  
16  
17

18  
19 If the antimicrobial treatment is modified before calendar day six, the system  
20 will assume to set up a re-evaluation and no alert will be displayed on day six.  
21  
22  
23

24  
25 If the alerts mentioned above are ignored and the antimicrobial treatment is  
26 continued, physicians will be asked to provide accountable justifications. The  
27 options for justifications include prophylaxis, empiric, and targeted treatment;  
28 as for targeted treatment, a predefined list of potential reasons will be provided  
29 with the availability to also enter free text, making it possible to assess  
30 prescribing quality and to provide specific decision supports.  
31  
32  
33  
34  
35  
36  
37  
38  
39

40 ■ Re-evaluation alerts and decision support for the choice of antimicrobial:  
41

42  
43 Physicians will be asked to select the treatment type at the time of prescribing  
44 (prophylaxis, empiric or targeted treatment). At the same time, the system will  
45 evaluate the justifications of the prescription on clinical data and according to  
46 the basic AMS rules (history of drug allergy, serum creatinine, drug  
47 incompatibility, et al.).  
48  
49  
50  
51  
52  
53  
54  
55

56 If the existing treatment strategy violates the basic AMS rules, the prescriber  
57 will be offered the choice to switch to the guideline-recommended treatment.  
58  
59  
60

1  
2  
3 Otherwise, prescribers will be asked to provide a justification for the deviation  
4  
5 from the guidelines.  
6  
7

8  
9 Moreover, treatment with regard to intravenous-oral switch, de-escalation or  
10  
11 stopping therapy will be recommended by the system if it is appropriate.  
12  
13

14 ■ Quality control audit and feedback:

15  
16  
17 Quality indicators of antimicrobial prescribing such as concordance with local  
18  
19 guidelines (in terms of duration of therapy and antimicrobial selected) will be  
20  
21 automatically assessed based on the information collected during the  
22  
23 prescribing process.  
24  
25

26  
27  
28 Team leaders in a given participant team in the intervention arm will receive  
29  
30 monthly graphical reports outlining the performance of the team compared  
31  
32 with the other participating teams and compared with the guideline  
33  
34 recommendation (if applicable). The individual participant surgeons will  
35  
36 receive the monthly audit report of their own performance.  
37  
38  
39

40 **Outcomes measures**

41  
42  
43 Table 1 gives detailed information about primary and secondary outcomes, including  
44  
45 full names, abbreviations, and evaluation purposes. The definitions of the terms were  
46  
47 listed in Supplementary Table S1.  
48  
49

50  
51  
52 The primary outcome will be the overall systemic antimicrobial use measured in DOT  
53  
54 of systemic antimicrobial use per admission and per 1000 patient-day based on CPOE-  
55  
56 derived data.  
57  
58

59  
60 Secondary outcomes include a series of indices to evaluate antimicrobial use, microbial

1  
2  
3 resistance, perioperative infection outcomes, patient safety, resource consumption, and  
4  
5 user compliance/satisfaction.  
6  
7

### 8 9 **Sample size**

10  
11  
12 The sample size calculation is based on the primary outcome (DOT per admission and  
13  
14 DOT per 1000 patient-day) and has been performed taking into account the clustered  
15  
16 design of the study according to the approach proposed in the literature.<sup>34</sup>  
17  
18

19  
20 The mean annual surgery volume of a team is about 450 cases in Fuwai Hospital, then  
21  
22 one team will include 225 patients who undergoing adult cardiac surgeries over the  
23  
24 research period (six months). Assuming one team will recruit 125 eligible patients and  
25  
26 assuming nine teams per arm with will have an average size of 1,125 admissions,  
27  
28 antimicrobial use of 5.0 DOT/admission in the control group with a standard deviation  
29  
30 of 2.0 (based on antimicrobial use data of 2019 in Fuwai hospital) and a two-sided type  
31  
32 I error of 0.05, we would have a power of 80% to detect an absolute difference of at  
33  
34 least 0.5 in average DOT/admission between the intervention and control arm.  
35  
36  
37  
38

### 39 **Blinding and randomization**

40  
41  
42 The trial steering committee is responsible for recruiting surgical teams to the trial and  
43  
44 supervising the research process but had no access to the randomization procedure. The  
45  
46 extraction of the outcome measures will be performed primarily by research staff not  
47  
48 directly involved in the study. The data analysts will be blinded to the randomization.  
49  
50  
51

52  
53 Neither the research staff directly involved in the intervention, nor the participant  
54  
55 surgeons, nor the participant patients are blinded to the randomization due to the nature  
56  
57 of the intervention.  
58  
59  
60

1  
2  
3 Surgical teams will be randomized 1:1 to the intervention or control arm using an  
4 interactive web response system. The randomization plan will be established by  
5  
6 research staff not directly involved in the study.  
7  
8  
9

### 10 **Scheme for statistical analysis**

11  
12  
13  
14 The efficacy of the intervention will be evaluated by analysing EMR and CPOE data  
15 that are routinely collected into the Fuwai database. Patients' data will be collected by  
16 their anonymized electronic case report form, including preoperative information  
17 (demographics, diagnosis, and comorbidities), surgical information, and details of  
18 prescriptions; anonymized surgeon information will be retrieved from the database of  
19 the personnel division of Fuwai. Written consents will be obtained from the participant  
20 patients.  
21  
22  
23  
24  
25  
26  
27  
28  
29

30  
31 Outcome variables will first be summarized across treatment and intervention groups  
32 and then explored using descriptive statistics. The DOT/admission at the individual  
33 level and DOT/1000 patient-day will be compared between two arms using a random-  
34 effects Poisson model. The following confounders will be considered: 1. Patient: sex,  
35 age, type of comorbidities and type of cardiovascular surgeries; 2. Surgeon: age, annual  
36 volume, professional title and academic title. All variables that result in a change of >5%  
37 in the coefficient for the intervention effect in bivariate regression will be added to the  
38 multivariate model, and the most parsimonious model will be selected through the  
39 conditional AIC. Collinearity will be checked through a correlation matrix, whereby  
40 the most relevant, clinical variable will be selected in case of  $R^2 > 0.8$ . The inverse  
41 probability of treatment weighting (IPTW) will be applied, if imbalances exist after  
42 randomization.  
43  
44  
45  
46  
47  
48  
49  
50  
51  
52  
53  
54  
55  
56  
57  
58  
59

60 The logistic regression analysis for clinical outcomes (indicators of patient safety,

1  
2  
3 infection, and antimicrobial resistance) will estimate the difference (95% CI) in the  
4  
5 outcome between intervention and control arms, adjusting for variables at patient level  
6  
7 as well as surgeon level.  
8  
9

10  
11 Data for healthcare usage and costs will be analysed at the individual level as reported  
12  
13 previously.<sup>35</sup> Total cost and antimicrobial cost will be compared between trial arms. A  
14  
15 general linear model will be used to estimate the mean costs for the patients.  
16  
17

18  
19 As a part of process evaluation, users' compliance and satisfaction with the computer-  
20  
21 based intervention protocol will be assessed. As for user compliance, the evaluation  
22  
23 will be done by document the total number of times the intervention tools fail to change  
24  
25 the physicians' decision on antimicrobial prescription over the intervention period. The  
26  
27 number representing compliance will be divided into quartiles and a trend test will be  
28  
29 implemented by introducing these into analyses as continuous variables.  
30  
31

32  
33 As for user satisfaction, a series of questionnaires will be developed to explore  
34  
35 participants' experiences of using the intervention tools and experiences of the study  
36  
37 implementation. Inductive thematic analysis will be used to analyse qualitative data.  
38  
39  
40

#### 41 **Data collection and process.**

42  
43  
44

45 The in-hospital information will be retrieved from the hospital's database which is  
46  
47 stored in the form of electronic case report form. Surgical associated adverse events  
48  
49 and SSIs events within 30 days will be followed up. The detailed protocol about the  
50  
51 follow up was described elsewhere.<sup>36</sup> Briefly, patients discharged alive were followed  
52  
53 at regular time intervals including the time point of postoperative 30 day. If the patients  
54  
55 reported adverse events, the medical records of the patients in the outpatient clinic of  
56  
57 Fuwai Hospital are double-checked. If the patients visit another hospital, they will be  
58  
59  
60

1  
2  
3 required to send paper copies of medical records by mail or photocopies through the  
4  
5 internet. De-identified data for research use will be stored in password-protected  
6  
7 Microsoft Excel files on secured hospital servers.  
8  
9

10  
11 For analysis, data will be imported into SAS version 9.4 (SAS Institute Inc, Cary, North  
12  
13 Carolina). Only investigators directly involved in the trial will have access to the data.  
14  
15 The data will be stored on secure servers with backup systems for five years after the  
16  
17 end of the trial.  
18  
19

### 20 21 **Duration of the trial**

22  
23  
24 The intervention period, lasting nine months, is composed of two parts: an internal pilot  
25  
26 period (three months) and the research period (six months).  
27  
28

29  
30 Before the launch of the research, an internal pilot will be conducted to demonstrate the  
31  
32 feasibility and acceptability of the intervention. Also, the pilot will allow a period for  
33  
34 the participant surgical teams to get familiar with the new computer-based tools for  
35  
36 AMS.  
37  
38

39  
40 In the pilot phase, intermediate outcome measures will include (1) the compatibility of  
41  
42 the new operation module with our EMR and EPOE systems; (2) evidence that the  
43  
44 intervention tools are accessed and used by prescribing members of staff in surgical  
45  
46 teams; and (3) successful delivery of regular feedback reports to surgical teams.  
47  
48

### 49 50 **Ethnics approval**

51  
52  
53 The Ethics Committee in Fuwai hospital approved this study. Participant surgeons in  
54  
55 Fuwai Hospital gave informed consent to the study. Although the intervention is at the  
56  
57 surgical team level, patients' informed consent will be obtained. In addition, an  
58  
59  
60



1  
2  
3 information leaflet will be provided to patients in the participating surgical teams.  
4  
5

### 6 **Patient and public involvement**

7  
8  
9  
10 Patients and public will not get involved in the development of the research question,  
11  
12 study design or any other part of this protocol.  
13  
14

### 15 **Dissemination and reporting**

16  
17  
18 Several publications in peer-reviewed journals are expected from this trial and these  
19  
20 will include description of the intervention development of the intervention content and  
21  
22 main findings of the trial. Also, the findings are planned to be presented at national and  
23  
24 international conferences.  
25  
26  
27

## 28 **DISCUSSION**

29  
30  
31  
32 Enlightened by the evidence in the literature, the EPIC trial is designed to evaluate the  
33  
34 efficacy of CDSS-support tools to reduce postoperative antimicrobial use. This study  
35  
36 has several strengths and limitations.  
37  
38

39  
40 Strengths: 1. The adequately powered, cluster-randomized, controlled trial addresses  
41  
42 many inadequacies in designs of the previous studies,<sup>33 37-39</sup> 2. Different from previous  
43  
44 studies in terms of the scope, setting and timing,<sup>17-19 41</sup> the EPIC trial is among the first  
45  
46 to assess the impact of CDSS tools on antimicrobial use in hospital settings; 3. Also, to  
47  
48 the best of our knowledge, this trial will be one of the first trials carried out in surgery  
49  
50 settings. On the basis of the increasing incidence of antimicrobial resistance, We are  
51  
52 trying to figure out a method to achieve the goal of a more reasonable use of  
53  
54 antimicrobial agents.<sup>41 42</sup>  
55  
56  
57

58  
59 Limitations: this trial is a single centre study which may increase type II error. However,  
60

1  
2  
3 heterogeneous organizations of AMS programs are noted among healthcare providers,  
4  
5 possibly due to patient-specific considerations, institution-specific factors, and local  
6  
7 antimicrobial use policies.<sup>43</sup> It is a challenge to carry out multicentre trials because the  
8  
9 factors above may be hard to be balanced or a huge sample size will be required which  
10  
11 beyond the sample size of the program recruitment. Therefore, to carry out a single  
12  
13 centre trial in a large-volume hospital with adequate surgical teams under the same  
14  
15 AMS system is required. The feed-back is a part of the computerized-tools in  
16  
17 management of antimicrobial, which may also influence antimicrobial use outcomes  
18  
19 and behaviour patterns that will limit external validity outside of this trial design.  
20  
21 Further study will be conducted to investigate the influence of the feed-back.  
22  
23  
24  
25  
26

27 An important output of this research will figure out a way of delivering a set of  
28  
29 computer-based multicomponent interventions to reduce antimicrobial use in surgical  
30  
31 settings. As a part of the study, rigorous audit mechanisms will examine facilitators and  
32  
33 barriers to implementation of the intervention, and assess user compliance/satisfaction  
34  
35 with the intervention protocol. The process above will expose whether surgeons'  
36  
37 behaviours will be changed by the CDSS during the intervention period. As a result, a  
38  
39 similar, low-cost system could be applied for the regular surgical workflow in other  
40  
41 hospitals.  
42  
43  
44  
45

#### 46 **Conflicts of Interests**

47  
48  
49 None  
50  
51

#### 52 **Author Statement**

53  
54  
55 SSH conceived the original idea for this study which was further developed with all  
56  
57 authors, and secured funding for the study. XY and KC wrote the first draft of this  
58  
59  
60

1  
2  
3 manuscript, and designed the CDSS tools. SH provided input regarding the sample size  
4  
5 calculations and statistical analysis. WZ, FY and XLD programmed CDSS tools. XWC  
6  
7 reviewed the regulations of CDSS tools according to the guidelines and policy. The  
8  
9 manuscript was reviewed and edited by all authors.  
10  
11  
12

### 13 **Acknowledgements**

14  
15  
16 The authors would like to thank all participants of the EPIC trial team for the valuable  
17  
18 work in the study, including the cardiovascular surgeons and their patients.  
19  
20  
21

### 22 **Funding**

23  
24  
25 This work is supported by the Foundation No.83 of Fuwai Hospital.  
26  
27  
28  
29  
30  
31  
32  
33  
34  
35  
36  
37  
38  
39  
40  
41  
42  
43  
44  
45  
46  
47  
48  
49  
50  
51  
52  
53  
54  
55  
56  
57  
58  
59  
60

## REFERENCES

1. Tackling a Crisis for the Future Health and Wealth of Nations. Review on Antimicrobial Resistance website. <http://amr-review.org/>. December 2014. Accessed March 4, 2020.
2. Office of the Press Secretary, The White House. Executive Order—Combating Antibiotic-Resistant Bacteria. Whitehouse. gov website. <https://www.whitehouse.gov/the-press-office/2014/09/18/executive-order-combating-antibiotic-resistant-bacteria>. 2014. Accessed March 4, 2020.
3. Branch-Elliman W, O'Brien W, Strymish J, et al. Association of Duration and Type of Surgical Prophylaxis With Antimicrobial-Associated Adverse Events. *JAMA Surg* 2019;154(7):590-98. doi: 10.1001/jamasurg.2019.0569 [published Online First: 2019/04/25]
4. Centers for Disease Control. Antibiotic/Antimicrobial Resistance. 2017 <https://www.cdc.gov/drugresistance/>. 2017. Accessed March 4, 2020.
5. Leaper DJ, Edmiston CE. World Health Organization: global guidelines for the prevention of surgical site infection. *J Hosp Infect* 2017;95(2):135-36. doi: 10.1016/j.jhin.2016.12.016 [published Online First: 2017/02/01]
6. Al-Mousa HH, Omar AA, Rosenthal VD, et al. Device-associated infection rates, bacterial resistance, length of stay, and mortality in Kuwait: International Nosocomial Infection Consortium findings. *Am J Infect Control* 2016;44(4):444-9. doi: 10.1016/j.ajic.2015.10.031 [published Online First: 2016/01/19]
7. Karanika S, Grigoras C, Flokas ME, et al. The Attributable Burden of Clostridium difficile Infection to Long-Term Care Facilities Stay: A Clinical Study. *J Am Geriatr Soc* 2017;65(8):1733-40. doi: 10.1111/jgs.14863 [published Online First: 2017/03/18]

- 1  
2  
3  
4 8. Alexiou VG, Ierodiakonou V, Peppas G, et al. Antimicrobial prophylaxis in surgery: an  
5  
6 international survey. *Surg Infect (Larchmt)* 2010;11(4):343-8. doi:  
7  
8 10.1089/sur.2009.023 [published Online First: 2010/08/11]  
9  
10  
11 9. Tourmousoglou CE, Yiannakopoulou E, Kalapothaki V, et al. Adherence to guidelines for  
12  
13 antibiotic prophylaxis in general surgery: a critical appraisal. *J Antimicrob Chemother*  
14  
15 2008;61(1):214-8. doi: 10.1093/jac/dkm406 [published Online First: 2007/11/15]  
16  
17  
18 10. Gagliotti C, Ravaglia F, Resi D, et al. Quality of local guidelines for surgical antimicrobial  
19  
20 prophylaxis. *J Hosp Infect* 2004;56(1):67-70. doi: 10.1016/j.jhin.2003.09.007  
21  
22 [published Online First: 2004/01/07]  
23  
24  
25 11. Manuel-Vazquez A, Palacios-Ortega F, Garcia-Septiem J, et al. Antimicrobial Stewardship  
26  
27 Programs Are Required in a Department of Surgery: "How" Is the Question A Quasi-  
28  
29 Experimental Study: Results after Three Years. *Surg Infect (Larchmt)* 2020;21(1):35-  
30  
31 42. doi: 10.1089/sur.2018.311 [published Online First: 2019/07/28]  
32  
33  
34 12. Ashfaq A, Zhu A, Iyengar A, et al. Impact of an Institutional Antimicrobial Stewardship  
35  
36 Program on Bacteriology of Surgical Site Infections in Cardiac Surgery. *J Card Surg*  
37  
38 2016;31(6):367-72. doi: 10.1111/jocs.12756 [published Online First: 2016/05/07]  
39  
40  
41 13. Schroder S, Klein MK, Heising B, et al. Sustainable implementation of antibiotic stewardship  
42  
43 on a surgical intensive care unit evaluated over a 10-year period. *Infection*  
44  
45 2020;48(1):117-24. doi: 10.1007/s15010-019-01375-6 [published Online First:  
46  
47 2019/11/14]  
48  
49  
50 14. Hersh AL, Beekmann SE, Polgreen PM, et al. Antimicrobial stewardship programs in  
51  
52 pediatrics. *Infect Control Hosp Epidemiol* 2009;30(12):1211-7. doi: 10.1086/648088  
53  
54  
55  
56  
57  
58  
59  
60

- 1  
2  
3  
4 [published Online First: 2009/10/27]  
5  
6  
7 15. Johannsson B, Beekmann SE, Srinivasan A, et al. Improving antimicrobial stewardship: the  
8  
9 evolution of programmatic strategies and barriers. *Infect Control Hosp Epidemiol*  
10  
11 2011;32(4):367-74. doi: 10.1086/658946 [published Online First: 2011/04/05]  
12  
13  
14 16. de Kraker MEA, Abbas M, Huttner B, et al. Good epidemiological practice: a narrative  
15  
16 review of appropriate scientific methods to evaluate the impact of antimicrobial  
17  
18 stewardship interventions. *Clin Microbiol Infect* 2017;23(11):819-25. doi:  
19  
20 10.1016/j.cmi.2017.05.019 [published Online First: 2017/06/03]  
21  
22  
23  
24 17. Gonzales R, Anderer T, McCulloch CE, et al. A cluster randomized trial of decision support  
25  
26 strategies for reducing antibiotic use in acute bronchitis. *JAMA Intern Med*  
27  
28 2013;173(4):267-73. doi: 10.1001/jamainternmed.2013.1589 [published Online First:  
29  
30 2013/01/16]  
31  
32  
33  
34 18. Gulliford MC, Prevost AT, Charlton J, et al. Effectiveness and safety of electronically  
35  
36 delivered prescribing feedback and decision support on antibiotic use for respiratory  
37  
38 illness in primary care: REDUCE cluster randomised trial. *BMJ* 2019;364:l236. doi:  
39  
40 10.1136/bmj.l236 [published Online First: 2019/02/14]  
41  
42  
43  
44 19. Curtis CE, Al Bahar F, Marriott JF. The effectiveness of computerised decision support on  
45  
46 antibiotic use in hospitals: A systematic review. *PLoS One* 2017;12(8):e0183062. doi:  
47  
48 10.1371/journal.pone.0183062 [published Online First: 2017/08/25]  
49  
50  
51  
52 20. Barlam TF, Cosgrove SE, Abbo LM, et al. Implementing an Antibiotic Stewardship Program:  
53  
54 Guidelines by the Infectious Diseases Society of America and the Society for  
55  
56 Healthcare Epidemiology of America. *Clin Infect Dis* 2016;62(10):e51-77. doi:  
57  
58  
59  
60

- 1  
2  
3  
4 10.1093/cid/ciw118 [published Online First: 2016/04/16]  
5  
6  
7 21. Dohmen PM. Influence of skin flora and preventive measures on surgical site infection  
8  
9 during cardiac surgery. *Surg Infect (Larchmt)* 2006;7 Suppl 1:S13-7. doi:  
10  
11 10.1089/sur.2006.7.s1-13 [published Online First: 2006/07/13]  
12  
13  
14 22. Schweizer M, Perencevich E, McDanel J, et al. Effectiveness of a bundled intervention of  
15  
16 decolonization and prophylaxis to decrease Gram positive surgical site infections after  
17  
18 cardiac or orthopedic surgery: systematic review and meta-analysis. *BMJ*  
19  
20 2013;346:f2743. doi: 10.1136/bmj.f2743 [published Online First: 2013/06/15]  
21  
22  
23  
24 23. Garey KW, Dao T, Chen H, et al. Timing of vancomycin prophylaxis for cardiac surgery  
25  
26 patients and the risk of surgical site infections. *J Antimicrob Chemother*  
27  
28 2006;58(3):645-50. doi: 10.1093/jac/dkl279 [published Online First: 2006/06/30]  
29  
30  
31  
32 24. Schersten H. Modified prophylaxis for preventing deep sternal wound infection after cardiac  
33  
34 surgery. *APMIS* 2007;115(9):1025-8. doi: 10.1111/j.1600-0463.2007.00837.x  
35  
36  
37 [published Online First: 2007/10/13]  
38  
39  
40 25. Garey KW, Amrutkar P, Dao-Tran TK, et al. Economic benefit of appropriate timing of  
41  
42 vancomycin prophylaxis in patients undergoing cardiovascular surgery.  
43  
44 *Pharmacotherapy* 2008;28(6):699-706. doi: 10.1592/phco.28.6.699 [published Online  
45  
46 First: 2008/05/28]  
47  
48  
49  
50 26. Garey KW, Lai D, Dao-Tran TK, et al. Interrupted time series analysis of vancomycin  
51  
52 compared to cefuroxime for surgical prophylaxis in patients undergoing cardiac surgery.  
53  
54 *Antimicrob Agents Chemother* 2008;52(2):446-51. doi: 10.1128/AAC.00495-07  
55  
56  
57 [published Online First: 2007/11/21]  
58  
59  
60

- 1  
2  
3  
4 27. Linnan L, Steckler A. Process evaluation for public health interventions and research.  
5  
6 California: Jossey-Bass San Francisco, 2002.  
7  
8  
9 28. Sousa-Uva M, Head SJ, Milojevic M, et al. 2017 EACTS Guidelines on perioperative  
10 medication in adult cardiac surgery. *Eur J Cardiothorac Surg* 2018;53(1):5-33. doi:  
11  
12 10.1093/ejcts/ezx314 [published Online First: 2017/10/14]  
13  
14  
15  
16  
17 29. Bratzler DW, Dellinger EP, Olsen KM, et al. Clinical practice guidelines for antimicrobial  
18 prophylaxis in surgery. *Am J Health Syst Pharm* 2013;70(3):195-283. doi:  
19  
20 10.2146/ajhp120568 [published Online First: 2013/01/19]  
21  
22  
23  
24  
25 30. Reinforce the national antimicrobial stewardship, regulations enclosed.  
26  
27 <http://www.nhc.gov.cn/zyygj/s3593/201508/f0fdf1f52df14b87aa97be53819f1036.shtm>  
28  
29 I. 2015. Accessed March 6, 2020.  
30  
31  
32  
33 31. Continue to implement national antimicrobial stewardship.  
34  
35 <http://www.nhc.gov.cn/zyygj/s7659/201903/1d487eb7b7c74abc9fcb104f8b0905f2.shtm>  
36  
37 ml. March 2019. Accessed March 6, 2020.  
38  
39  
40  
41 32. Linder JA, Meeker D, Fox CR, et al. Effects of Behavioral Interventions on Inappropriate  
42 Antibiotic Prescribing in Primary Care 12 Months After Stopping Interventions. *JAMA*  
43 2017;318(14):1391-92. doi: 10.1001/jama.2017.11152 [published Online First:  
44  
45 2017/10/20]  
46  
47  
48  
49  
50  
51 33. Demonchy E, Dufour JC, Gaudart J, et al. Impact of a computerized decision support  
52 system on compliance with guidelines on antibiotics prescribed for urinary tract  
53 infections in emergency departments: a multicentre prospective before-and-after  
54 controlled interventional study. *J Antimicrob Chemother* 2014;69(10):2857-63. doi:  
55  
56  
57  
58  
59  
60



- 1  
2  
3  
4 10.1093/jac/dku191 [published Online First: 2014/06/06]  
5  
6  
7 34. Leyrat C, Morgan KE, Leurent B, et al. Cluster randomized trials with a small number of  
8  
9 clusters: which analyses should be used? *Int J Epidemiol* 2018;47(1):321-31. doi:  
10  
11 10.1093/ije/dyx169 [published Online First: 2017/10/13]  
12  
13  
14 35. Bhattarai N, Charlton J, Rudisill C, et al. Prevalence of depression and utilization of health  
15  
16 care in single and multiple morbidity: a population-based cohort study. *Psychol Med*  
17  
18 2013;43(7):1423-31. doi: 10.1017/S0033291712002498 [published Online First:  
19  
20 2012/11/02]  
21  
22  
23  
24 36. Hu S, Zheng Z, Yuan X, et al. Increasing long-term major vascular events and resource  
25  
26 consumption in patients receiving off-pump coronary artery bypass: a single-center  
27  
28 prospective observational study. *Circulation* 2010;121(16):1800-8. doi:  
29  
30 10.1161/CIRCULATIONAHA.109.894543 [published Online First: 2010/04/14]  
31  
32  
33  
34 37. Baysari MT, Lehnbohm EC, Li L, et al. The effectiveness of information technology to improve  
35  
36 antimicrobial prescribing in hospitals: A systematic review and meta-analysis. *Int J Med*  
37  
38 *Inform* 2016;92:15-34. doi: 10.1016/j.ijmedinf.2016.04.008 [published Online First:  
39  
40 2016/06/19]  
41  
42  
43  
44 38. Nachtigall I, Tafelski S, Deja M, et al. Long-term effect of computer-assisted decision  
45  
46 support for antibiotic treatment in critically ill patients: a prospective 'before/after' cohort  
47  
48 study. *BMJ Open* 2014;4(12):e005370. doi: 10.1136/bmjopen-2014-005370 [published  
49  
50 Online First: 2014/12/24]  
51  
52  
53  
54 39. Paul M, Andreassen S, Tacconelli E, et al. Improving empirical antibiotic treatment using  
55  
56 TREAT, a computerized decision support system: cluster randomized trial. *J*  
57  
58  
59  
60

- 1  
2  
3  
4 *Antimicrob Chemother* 2006;58(6):1238-45. doi: 10.1093/jac/dkl372 [published Online  
5  
6  
7 First: 2006/09/26]  
8
- 9 40. Vaisman A, McCready J, Hicks S, et al. Optimizing preoperative prophylaxis in patients with  
10  
11 reported beta-lactam allergy: a novel extension of antimicrobial stewardship. *J*  
12  
13 *Antimicrob Chemother* 2017;72(9):2657-60. doi: 10.1093/jac/dkx171 [published Online  
14  
15  
16  
17 First: 2017/06/13]  
18
- 19 41. Bratzler DW, Houck PM, Surgical Infection Prevention Guidelines Writers W, et al.  
20  
21 Antimicrobial prophylaxis for surgery: an advisory statement from the National Surgical  
22  
23 Infection Prevention Project. *Clin Infect Dis* 2004;38(12):1706-15. doi: 10.1086/421095  
24  
25  
26  
27 [published Online First: 2004/07/01]  
28  
29
- 30 42. Miller LG, McKinnell JA, Vollmer ME, et al. Impact of methicillin-resistant *Staphylococcus*  
31  
32 *aureus* prevalence among *S. aureus* isolates on surgical site infection risk after  
33  
34 coronary artery bypass surgery. *Infect Control Hosp Epidemiol* 2011;32(4):342-50. doi:  
35  
36  
37 10.1086/658668 [published Online First: 2011/04/05]  
38  
39
- 40 43. Sartelli M, Labricciosa FM, Barbadoro P, et al. The Global Alliance for Infections in Surgery:  
41  
42 defining a model for antimicrobial stewardship-results from an international cross-  
43  
44 sectional survey. *World J Emerg Surg* 2017;12:34. doi: 10.1186/s13017-017-0145-2  
45  
46  
47  
48 [published Online First: 2017/08/05]  
49
- 50 44. Ibrahim NH, Maruan K, Mohd Khairy HA, et al. Economic Evaluations on Antimicrobial  
51  
52 Stewardship Programme: A Systematic Review. *J Pharm Pharm Sci* 2017;20(1):397-  
53  
54  
55  
56 406. doi: 10.18433/J3NW7G [published Online First: 2017/11/18]  
57  
58  
59  
60

**Table 1**  
**Outline of primary and secondary outcomes**

| <b>Outcomes</b>                                                                                                                                                                                                                                                                                                                                                    | <b>Evaluation purposes</b>                                                                                                                                                                                                                                                                                                                                     |
|--------------------------------------------------------------------------------------------------------------------------------------------------------------------------------------------------------------------------------------------------------------------------------------------------------------------------------------------------------------------|----------------------------------------------------------------------------------------------------------------------------------------------------------------------------------------------------------------------------------------------------------------------------------------------------------------------------------------------------------------|
| <b>Primary outcomes</b>                                                                                                                                                                                                                                                                                                                                            |                                                                                                                                                                                                                                                                                                                                                                |
| <ol style="list-style-type: none"> <li>1. Days of antimicrobial therapy (DOT) per admission</li> <li>2. DOT per 1000 patient-days (PD)</li> </ol>                                                                                                                                                                                                                  | To evaluate the difference in overall systemic antimicrobial use in terms of duration of treatment and combination therapies between the intervention arm and control arm.                                                                                                                                                                                     |
| <b>Secondary outcomes</b>                                                                                                                                                                                                                                                                                                                                          |                                                                                                                                                                                                                                                                                                                                                                |
| <b>Antimicrobial use indicators</b>                                                                                                                                                                                                                                                                                                                                |                                                                                                                                                                                                                                                                                                                                                                |
| <ol style="list-style-type: none"> <li>1. Drug usage (DDDs) per 100 PD and per admission</li> <li>2. Length of therapy (LOT) per 100 PD and per admission</li> <li>3. Days per treatment period overall and for specific indications</li> </ol>                                                                                                                    | The same as the evaluation purposes for “DOT per admission”.                                                                                                                                                                                                                                                                                                   |
| <b>postoperative microbial resistance indicators</b>                                                                                                                                                                                                                                                                                                               |                                                                                                                                                                                                                                                                                                                                                                |
| <ol style="list-style-type: none"> <li>1. Clostridium difficile colitis</li> <li>2. Incident clinical cultures with multidrug resistant organisms (MRSA, ESBL-E, CRE, VRE, or Pseudomonas aeruginosa) per 1000 PD and admission.</li> </ol>                                                                                                                        | To evaluate the efficacies of the computer-based multicomponent intervention to reduce the incidence of antimicrobial resistance.                                                                                                                                                                                                                              |
| <b>Postoperative infection indicators</b>                                                                                                                                                                                                                                                                                                                          |                                                                                                                                                                                                                                                                                                                                                                |
| <ol style="list-style-type: none"> <li>1. In-hospital or 30-day surgical site infections (SSIs)</li> <li>2. In-hospital bloodstream infections</li> <li>3. In-hospital pneumonia</li> </ol>                                                                                                                                                                        | To evaluate the potential side-effects of the computer-based multicomponent intervention to elevate the incidence of antimicrobial resistance.                                                                                                                                                                                                                 |
| <b>Patient safety indicators</b>                                                                                                                                                                                                                                                                                                                                   |                                                                                                                                                                                                                                                                                                                                                                |
| <ol style="list-style-type: none"> <li>1. In-hospital or 30-day mortality, postoperative</li> <li>2. In-hospital or 30-day myocardial infarction (MI), postoperative and newly onset</li> <li>3. In-hospital or 30-day stroke, postoperative and newly onset</li> <li>4. In-hospital or 30-day acute kidney injury (AKI), postoperative and newly onset</li> </ol> | <p>We do not anticipate any potential serious adverse events that could be directly attributable to the intervention but we could not rule out the indirect association between these outcomes and the intervention.</p> <p>Therefore, in consideration of patient safety issues, we will compare the surgical-related complications between the two arms.</p> |
| <b>Resource consuming indicators</b>                                                                                                                                                                                                                                                                                                                               |                                                                                                                                                                                                                                                                                                                                                                |
| <ol style="list-style-type: none"> <li>1. Length of hospital stay (LOS)</li> </ol>                                                                                                                                                                                                                                                                                 | One of the main interest to various parts                                                                                                                                                                                                                                                                                                                      |

|                                                                                                                                                 |                                                                                                                                                                                |
|-------------------------------------------------------------------------------------------------------------------------------------------------|--------------------------------------------------------------------------------------------------------------------------------------------------------------------------------|
| <p>2. Costs of administered antimicrobials (overall and by class) per admission</p> <p>3. Total costs of hospitalization.</p>                   | <p>of the healthcare system.<sup>44</sup> These indicators are set to evaluate the efficacies of the computer-based AMS system to reduce the overall resource consumption.</p> |
| <p><b>User compliance and satisfaction indicators</b></p> <p>1. User satisfaction with the system</p> <p>2. User compliance with the system</p> | <p>These two indices are to evaluate the barriers and facilitators to implementation and the use of the computer-based intervention.</p>                                       |

DDD=defined daily dose.

ESBL-E=extended spectrum beta-lactamase producing Enterobacteriaceae.

MRSA=meticillin-resistant Staphylococcus aureus.

VRE=vancomycin-resistant enterococci.

1  
2  
3  
4 **FIGURE LEGEND**  
5

6  
7 **Figure 1. Flow chart of the study design.**  
8

9  
10  
11 **Figure 2. The multicomponent, computer-based interventions in the EPIC trial.**  
12  
13  
14  
15  
16  
17  
18  
19  
20  
21  
22  
23  
24  
25  
26  
27  
28  
29  
30  
31  
32  
33  
34  
35  
36  
37  
38  
39  
40  
41  
42  
43  
44  
45  
46  
47  
48  
49  
50  
51  
52  
53  
54  
55  
56  
57  
58  
59  
60

For peer review only

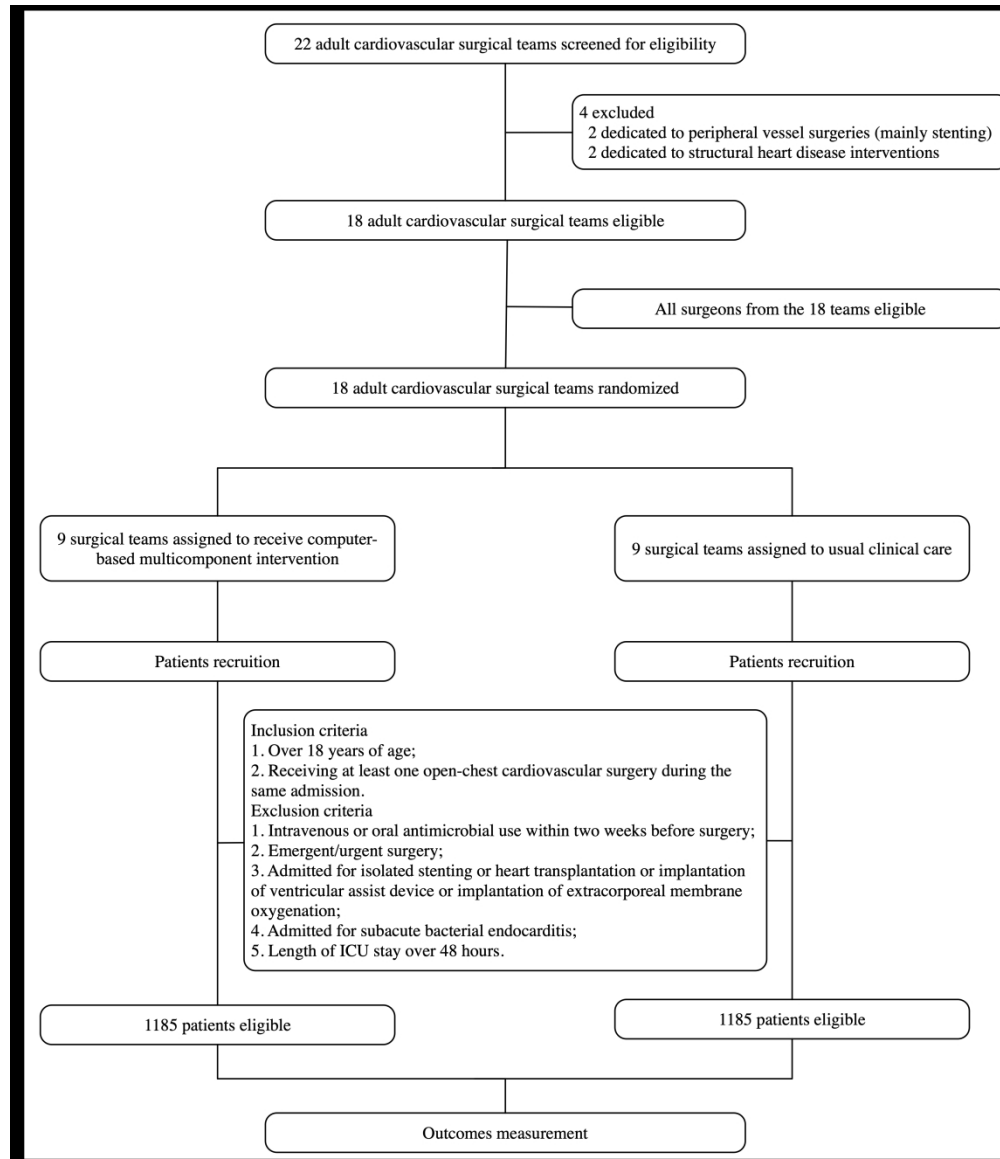

Figure 1. Flow chart of the study design.

246x286mm (400 x 400 DPI)

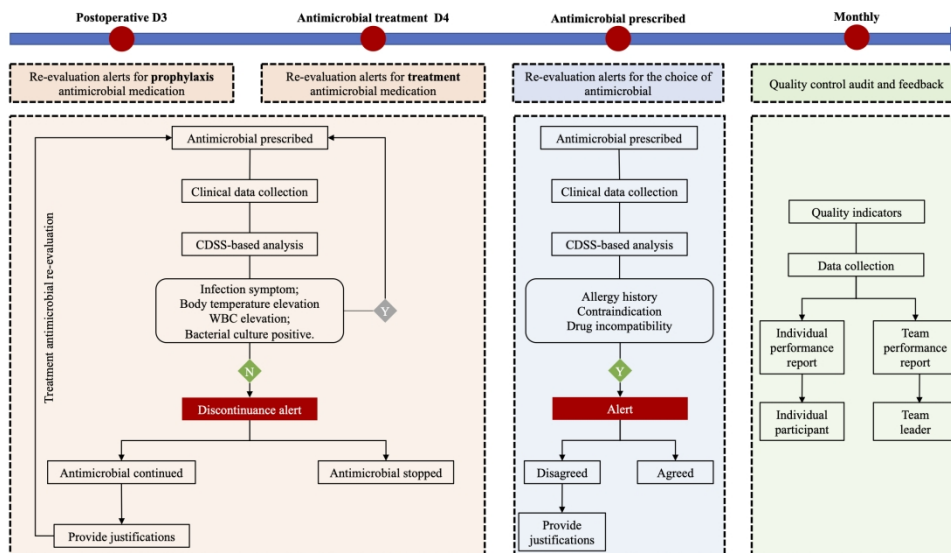

Figure 2. The multicomponent, computer-based interventions in the EPIC trial.

338x190mm (200 x 200 DPI)

## Supplementary material

Table S1

## Terms and definitions

| Term                                                  | Definition                                                                                                                                                                                                                                                                                                                                                                                                                                                                                                                                                                                                                              |
|-------------------------------------------------------|-----------------------------------------------------------------------------------------------------------------------------------------------------------------------------------------------------------------------------------------------------------------------------------------------------------------------------------------------------------------------------------------------------------------------------------------------------------------------------------------------------------------------------------------------------------------------------------------------------------------------------------------|
| Days of therapy (DOT)                                 | One DOT represents a specific antimicrobial administered to an individual patient on a calendar day independent of dose and route.                                                                                                                                                                                                                                                                                                                                                                                                                                                                                                      |
| Defined daily dose (DDD)                              | The assumed average maintenance dose per day for a drug used for its main indication in adults. Items issued $\times$ Amount of drug per item=DDD                                                                                                                                                                                                                                                                                                                                                                                                                                                                                       |
| Length of therapy (LOT)                               | Number of days during which antimicrobial is used.                                                                                                                                                                                                                                                                                                                                                                                                                                                                                                                                                                                      |
| Treatment period                                      | Antimicrobial treatment not interrupted by more than one calendar day or discharge.                                                                                                                                                                                                                                                                                                                                                                                                                                                                                                                                                     |
| Clostridium difficile colitis                         | Colitis associated with Clostridium difficile infection (ICD 10: A04.7)                                                                                                                                                                                                                                                                                                                                                                                                                                                                                                                                                                 |
| Multidrug resistant organisms                         | Resistant to three or more antimicrobial classes, including methicillin-resistant Staphylococcus aureus (MRSA), extended spectrum beta-lactamase producing Enterobacteriaceae (ESBL-E), carbapenem resistant Enterobacteriaceae (CRE), vancomycin-resistant enterococci (VRE), and Pseudomonas aeruginosa.                                                                                                                                                                                                                                                                                                                              |
| In-hospital or 30-day surgical site infections (SSIs) | Occurs within 30 days postoperatively and involves skin or subcutaneous tissue of the incision and at least one of the following: (1) purulent drainage from the incision, (2) organisms isolated from an aseptically obtained culture of fluid or tissue from the incision, (3) at least one of the following signs or symptoms of infection: pain or tenderness, localized swelling, redness, or heat, and incision is deliberately opened by surgeon and is culture-positive or not cultured (a culture-negative finding does not meet this criterion), and (4) diagnosis of SSI by the surgeon or attending physician. <sup>1</sup> |
| Bloodstream infections                                | Blood stream infection after surgery (ICD 10: A41.9)                                                                                                                                                                                                                                                                                                                                                                                                                                                                                                                                                                                    |
| Pneumonia                                             | Pulmonary infection after surgery (ICD 10: J98.402)                                                                                                                                                                                                                                                                                                                                                                                                                                                                                                                                                                                     |
| Myocardial infarction (MI)                            | In accordance with the fourth edition of MI definition Termed type 5 MI, procedure related MI. <sup>2</sup> Briefly, the criteria are as follows: <ul style="list-style-type: none"> <li>• Elevation of cTn&gt;10 times of the 9th percentile URL with patients with normal baseline;</li> <li>• For patients with elevated preprocedural cTn values, elevation of cTn&gt;10-fold increase and manifest a change from the baseline value of over 20%;</li> </ul>                                                                                                                                                                        |



|                           |                                                                                                                                                                                                                                                                                                                                                                                                                                                                                                                                                                                                                                                                                                                                                                                     |
|---------------------------|-------------------------------------------------------------------------------------------------------------------------------------------------------------------------------------------------------------------------------------------------------------------------------------------------------------------------------------------------------------------------------------------------------------------------------------------------------------------------------------------------------------------------------------------------------------------------------------------------------------------------------------------------------------------------------------------------------------------------------------------------------------------------------------|
|                           | <ul style="list-style-type: none"> <li>• With as least one of the following:</li> <li>• Development of new pathological Q waves;</li> <li>• Imaging evidence of loss of viable myocardium that is presumed to be new and in a pattern consistent with an ischemic aetiology;</li> <li>• Angiographic findings consistent with a procedural flow-limiting complication.</li> </ul>                                                                                                                                                                                                                                                                                                                                                                                                   |
| Stroke                    | Refers to newly onset stroke after surgery (ICD 10: I60.0-I60.9; I61.0-I61.9; I62.0; I62.1; I62.9; I63.0-I63.9; I64)                                                                                                                                                                                                                                                                                                                                                                                                                                                                                                                                                                                                                                                                |
| Acute kidney injury (AKI) | <p>Refers to newly onset AKI after surgery</p> <ul style="list-style-type: none"> <li>• Acute renal dysfunction within 48 hours (ICD 10: N17);</li> <li>• AKI stage I: creatinine<math>\geq</math>26.5<math>\mu</math>mol/L; creatinine over 1.5-1.9 times of baseline value; urine output<math>&lt;</math>0.5ml/kg/hour for 6-12 hours;</li> <li>• AKI stage II: creatinine over 2.0 to 2.9 times of baseline value; urine output<math>&lt;</math>0.5ml/kg/hour for over 12 hours;</li> <li>• AKI stage III: creatinine<math>\geq</math>353.6<math>\mu</math>mol/L; creatinine over 3 times of baseline value; initiation of renal replacement therapy; urine output<math>&lt;</math>0.3ml/kg/hour for <math>\geq</math>24 hours; anuria for <math>\geq</math>24 hours.</li> </ul> |
| User satisfaction         | Users will primarily include surgeons in the intervention arm, but nurses involved with intervention implementation will also be included, aiming for the maximum achievable sample. We will explore their unique and important perspective using questionnaire and an interview guide for the process evaluation of public health interventions and researches. <sup>3</sup> Also, we will explore participants' experiences of using the intervention resources and experiences of the study implementation. As a part of process evaluation, contextual information on initiatives to prescribe antimicrobial will be collected through a popup window at the time when a new antimicrobial order is input in the CPOE system.                                                   |
| User compliance           | As a part of process evaluation, compliance with the multicomponent intervention protocols will be assessed. This will be done by evaluating the total number of times the intervention tools fail to change the physicians' decision on antimicrobial prescription over the intervention period.                                                                                                                                                                                                                                                                                                                                                                                                                                                                                   |

ICD=international classification of diseases.

1  
2  
3  
4  
5  
6  
7  
8  
9  
10  
11  
12  
13  
14  
15  
16  
17  
18  
19  
20  
21  
22  
23  
24  
25  
26  
27  
28  
29  
30  
31  
32  
33  
34  
35  
36  
37  
38  
39  
40  
41  
42  
43  
44  
45  
46  
47  
48  
49  
50  
51  
52  
53  
54  
55  
56  
57  
58  
59  
60

URL=upper range limit.  
CPOE= computerized physician order entry.

For peer review only

## Reference

1. Bratzler DW, Dellinger EP, Olsen KM, et al. Clinical practice guidelines for antimicrobial prophylaxis in surgery. *Am J Health Syst Pharm* 2013;70(3):195-283. doi: 10.2146/ajhp120568 [published Online First: 2013/01/19]
2. Thygesen K, Alpert JS, Jaffe AS, et al. Fourth Universal Definition of Myocardial Infarction (2018). *J Am Coll Cardiol* 2018;72(18):2231-64. doi: 10.1016/j.jacc.2018.08.1038 [published Online First: 2018/08/30]
3. Linnan L, Steckler A. Process evaluation for public health interventions and research. California: Jossey-Bass San Francisco, 2002.

For peer review only

# Reporting checklist for protocol of a clinical trial.

Based on the SPIRIT guidelines.

## Instructions to authors

Complete this checklist by entering the page numbers from your manuscript where readers will find each of the items listed below.

Your article may not currently address all the items on the checklist. Please modify your text to include the missing information. If you are certain that an item does not apply, please write "n/a" and provide a short explanation.

Upload your completed checklist as an extra file when you submit to a journal.

In your methods section, say that you used the SPIRIT reporting guidelines, and cite them as:

Chan A-W, Tetzlaff JM, Altman DG, Laupacis A, Gøtzsche PC, Krleža-Jerić K, Hróbjartsson A, Mann H, Dickersin K, Berlin J, Doré C, Parulekar W, Summerskill W, Groves T, Schulz K, Sox H, Rockhold FW, Rennie D, Moher D. SPIRIT 2013 Statement: Defining standard protocol items for clinical trials. *Ann Intern Med.* 2013;158(3):200-207

|                                   |                     | Reporting Item                                                                                               | Page Number |
|-----------------------------------|---------------------|--------------------------------------------------------------------------------------------------------------|-------------|
| <b>Administrative information</b> |                     |                                                                                                              |             |
| Title                             | <a href="#">#1</a>  | Descriptive title identifying the study design, population, interventions, and, if applicable, trial acronym | 1           |
| Trial registration                | <a href="#">#2a</a> | Trial identifier and registry name. If not yet registered, name of intended registry                         | 1           |
| Trial registration: data set      | <a href="#">#2b</a> | All items from the World Health Organization Trial Registration Data Set                                     | 1-2         |
| Protocol version                  | <a href="#">#3</a>  | Date and version identifier                                                                                  | 2           |
| Funding                           | <a href="#">#4</a>  | Sources and types of financial, material, and other support                                                  | 2           |
| Roles and responsibilities:       | <a href="#">#5a</a> | Names, affiliations, and roles of protocol contributors                                                      | 3-4         |

1 contributorship

2  
3 Roles and [#5b](#) Name and contact information for the trial sponsor 4  
4 responsibilities:  
5 sponsor contact  
6 information  
7  
8

9  
10 Roles and [#5c](#) Role of study sponsor and funders, if any, in study design; 4  
11 responsibilities: collection, management, analysis, and interpretation of  
12 sponsor and funder data; writing of the report; and the decision to submit the  
13 report for publication, including whether they will have  
14 ultimate authority over any of these activities  
15  
16  
17

18 Roles and [#5d](#) Composition, roles, and responsibilities of the coordinating 4-5  
19 responsibilities: centre, steering committee, endpoint adjudication  
20 committees committee, data management team, and other individuals  
21 or groups overseeing the trial, if applicable (see Item 21a  
22 for data monitoring committee)  
23  
24  
25  
26

## 27 Introduction

28  
29 Background and [#6a](#) Description of research question and justification for 5-7  
30 rationale undertaking the trial, including summary of relevant  
31 studies (published and unpublished) examining benefits  
32 and harms for each intervention  
33  
34  
35

36 Background and [#6b](#) Explanation for choice of comparators 7  
37 rationale: choice of  
38 comparators  
39  
40  
41

42 Objectives [#7](#) Specific objectives or hypotheses 7  
43

44 Trial design [#8](#) Description of trial design including type of trial (eg, 7  
45 parallel group, crossover, factorial, single group),  
46 allocation ratio, and framework (eg, superiority,  
47 equivalence, non-inferiority, exploratory)  
48  
49  
50

## 51 Methods:

### 52 Participants, 53 interventions, and 54 outcomes 55 56 57

58 Study setting [#9](#) Description of study settings (eg, community clinic, 8  
59

academic hospital) and list of countries where data will be collected. Reference to where list of study sites can be obtained

|    |                      |                      |                                                                                                                                                                                                                                                                                                                                                                                |
|----|----------------------|----------------------|--------------------------------------------------------------------------------------------------------------------------------------------------------------------------------------------------------------------------------------------------------------------------------------------------------------------------------------------------------------------------------|
| 1  |                      |                      |                                                                                                                                                                                                                                                                                                                                                                                |
| 2  |                      |                      |                                                                                                                                                                                                                                                                                                                                                                                |
| 3  |                      |                      |                                                                                                                                                                                                                                                                                                                                                                                |
| 4  |                      |                      |                                                                                                                                                                                                                                                                                                                                                                                |
| 5  |                      |                      |                                                                                                                                                                                                                                                                                                                                                                                |
| 6  | Eligibility criteria | <a href="#">#10</a>  | Inclusion and exclusion criteria for participants. If applicable, eligibility criteria for study centres and individuals who will perform the interventions (eg, surgeons, psychotherapists)                                                                                                                                                                                   |
| 7  |                      |                      |                                                                                                                                                                                                                                                                                                                                                                                |
| 8  |                      |                      |                                                                                                                                                                                                                                                                                                                                                                                |
| 9  |                      |                      |                                                                                                                                                                                                                                                                                                                                                                                |
| 10 |                      |                      |                                                                                                                                                                                                                                                                                                                                                                                |
| 11 |                      |                      |                                                                                                                                                                                                                                                                                                                                                                                |
| 12 |                      |                      |                                                                                                                                                                                                                                                                                                                                                                                |
| 13 | Interventions:       | <a href="#">#11a</a> | Interventions for each group with sufficient detail to allow replication, including how and when they will be administered                                                                                                                                                                                                                                                     |
| 14 | description          |                      |                                                                                                                                                                                                                                                                                                                                                                                |
| 15 |                      |                      |                                                                                                                                                                                                                                                                                                                                                                                |
| 16 |                      |                      |                                                                                                                                                                                                                                                                                                                                                                                |
| 17 |                      |                      |                                                                                                                                                                                                                                                                                                                                                                                |
| 18 | Interventions:       | <a href="#">#11b</a> | Criteria for discontinuing or modifying allocated interventions for a given trial participant (eg, drug dose change in response to harms, participant request, or improving / worsening disease)                                                                                                                                                                               |
| 19 | modifications        |                      |                                                                                                                                                                                                                                                                                                                                                                                |
| 20 |                      |                      |                                                                                                                                                                                                                                                                                                                                                                                |
| 21 |                      |                      |                                                                                                                                                                                                                                                                                                                                                                                |
| 22 |                      |                      |                                                                                                                                                                                                                                                                                                                                                                                |
| 23 |                      |                      |                                                                                                                                                                                                                                                                                                                                                                                |
| 24 |                      |                      |                                                                                                                                                                                                                                                                                                                                                                                |
| 25 | Interventions:       | <a href="#">#11c</a> | Strategies to improve adherence to intervention protocols, and any procedures for monitoring adherence (eg, drug tablet return; laboratory tests)                                                                                                                                                                                                                              |
| 26 | adherence            |                      |                                                                                                                                                                                                                                                                                                                                                                                |
| 27 |                      |                      |                                                                                                                                                                                                                                                                                                                                                                                |
| 28 |                      |                      |                                                                                                                                                                                                                                                                                                                                                                                |
| 29 |                      |                      |                                                                                                                                                                                                                                                                                                                                                                                |
| 30 |                      |                      |                                                                                                                                                                                                                                                                                                                                                                                |
| 31 | Interventions:       | <a href="#">#11d</a> | Relevant concomitant care and interventions that are permitted or prohibited during the trial                                                                                                                                                                                                                                                                                  |
| 32 | concomitant care     |                      |                                                                                                                                                                                                                                                                                                                                                                                |
| 33 |                      |                      |                                                                                                                                                                                                                                                                                                                                                                                |
| 34 |                      |                      |                                                                                                                                                                                                                                                                                                                                                                                |
| 35 | Outcomes             | <a href="#">#12</a>  | Primary, secondary, and other outcomes, including the specific measurement variable (eg, systolic blood pressure), analysis metric (eg, change from baseline, final value, time to event), method of aggregation (eg, median, proportion), and time point for each outcome. Explanation of the clinical relevance of chosen efficacy and harm outcomes is strongly recommended |
| 36 |                      |                      |                                                                                                                                                                                                                                                                                                                                                                                |
| 37 |                      |                      |                                                                                                                                                                                                                                                                                                                                                                                |
| 38 |                      |                      |                                                                                                                                                                                                                                                                                                                                                                                |
| 39 |                      |                      |                                                                                                                                                                                                                                                                                                                                                                                |
| 40 |                      |                      |                                                                                                                                                                                                                                                                                                                                                                                |
| 41 |                      |                      |                                                                                                                                                                                                                                                                                                                                                                                |
| 42 |                      |                      |                                                                                                                                                                                                                                                                                                                                                                                |
| 43 |                      |                      |                                                                                                                                                                                                                                                                                                                                                                                |
| 44 |                      |                      |                                                                                                                                                                                                                                                                                                                                                                                |
| 45 |                      |                      |                                                                                                                                                                                                                                                                                                                                                                                |
| 46 |                      |                      |                                                                                                                                                                                                                                                                                                                                                                                |
| 47 | Participant timeline | <a href="#">#13</a>  | Time schedule of enrolment, interventions (including any run-ins and washouts), assessments, and visits for participants. A schematic diagram is highly recommended (see Figure)                                                                                                                                                                                               |
| 48 |                      |                      |                                                                                                                                                                                                                                                                                                                                                                                |
| 49 |                      |                      |                                                                                                                                                                                                                                                                                                                                                                                |
| 50 |                      |                      |                                                                                                                                                                                                                                                                                                                                                                                |
| 51 |                      |                      |                                                                                                                                                                                                                                                                                                                                                                                |
| 52 |                      |                      |                                                                                                                                                                                                                                                                                                                                                                                |
| 53 |                      |                      |                                                                                                                                                                                                                                                                                                                                                                                |
| 54 | Sample size          | <a href="#">#14</a>  | Estimated number of participants needed to achieve study objectives and how it was determined, including clinical and statistical assumptions supporting any sample size calculations                                                                                                                                                                                          |
| 55 |                      |                      |                                                                                                                                                                                                                                                                                                                                                                                |
| 56 |                      |                      |                                                                                                                                                                                                                                                                                                                                                                                |
| 57 |                      |                      |                                                                                                                                                                                                                                                                                                                                                                                |
| 58 |                      |                      |                                                                                                                                                                                                                                                                                                                                                                                |
| 59 |                      |                      |                                                                                                                                                                                                                                                                                                                                                                                |
| 60 |                      |                      |                                                                                                                                                                                                                                                                                                                                                                                |

|    |                           |                      |                                                                                                                                                                                                                                                                                                                                                          |       |
|----|---------------------------|----------------------|----------------------------------------------------------------------------------------------------------------------------------------------------------------------------------------------------------------------------------------------------------------------------------------------------------------------------------------------------------|-------|
| 1  | Recruitment               | <a href="#">#15</a>  | Strategies for achieving adequate participant enrolment to reach target sample size                                                                                                                                                                                                                                                                      | 15    |
| 2  |                           |                      |                                                                                                                                                                                                                                                                                                                                                          |       |
| 3  |                           |                      |                                                                                                                                                                                                                                                                                                                                                          |       |
| 4  |                           |                      |                                                                                                                                                                                                                                                                                                                                                          |       |
| 5  | <b>Methods:</b>           |                      |                                                                                                                                                                                                                                                                                                                                                          |       |
| 6  | <b>Assignment of</b>      |                      |                                                                                                                                                                                                                                                                                                                                                          |       |
| 7  | <b>interventions (for</b> |                      |                                                                                                                                                                                                                                                                                                                                                          |       |
| 8  | <b>controlled trials)</b> |                      |                                                                                                                                                                                                                                                                                                                                                          |       |
| 9  |                           |                      |                                                                                                                                                                                                                                                                                                                                                          |       |
| 10 |                           |                      |                                                                                                                                                                                                                                                                                                                                                          |       |
| 11 |                           |                      |                                                                                                                                                                                                                                                                                                                                                          |       |
| 12 | Allocation: sequence      | <a href="#">#16a</a> | Method of generating the allocation sequence (eg, computer-generated random numbers), and list of any factors for stratification. To reduce predictability of a random sequence, details of any planned restriction (eg, blocking) should be provided in a separate document that is unavailable to those who enrol participants or assign interventions | 16    |
| 13 | generation                |                      |                                                                                                                                                                                                                                                                                                                                                          |       |
| 14 |                           |                      |                                                                                                                                                                                                                                                                                                                                                          |       |
| 15 |                           |                      |                                                                                                                                                                                                                                                                                                                                                          |       |
| 16 |                           |                      |                                                                                                                                                                                                                                                                                                                                                          |       |
| 17 |                           |                      |                                                                                                                                                                                                                                                                                                                                                          |       |
| 18 |                           |                      |                                                                                                                                                                                                                                                                                                                                                          |       |
| 19 |                           |                      |                                                                                                                                                                                                                                                                                                                                                          |       |
| 20 |                           |                      |                                                                                                                                                                                                                                                                                                                                                          |       |
| 21 |                           |                      |                                                                                                                                                                                                                                                                                                                                                          |       |
| 22 |                           |                      |                                                                                                                                                                                                                                                                                                                                                          |       |
| 23 |                           |                      |                                                                                                                                                                                                                                                                                                                                                          |       |
| 24 | Allocation                | <a href="#">#16b</a> | Mechanism of implementing the allocation sequence (eg, central telephone; sequentially numbered, opaque, sealed envelopes), describing any steps to conceal the sequence until interventions are assigned                                                                                                                                                | 16    |
| 25 | concealment               |                      |                                                                                                                                                                                                                                                                                                                                                          |       |
| 26 | mechanism                 |                      |                                                                                                                                                                                                                                                                                                                                                          |       |
| 27 |                           |                      |                                                                                                                                                                                                                                                                                                                                                          |       |
| 28 |                           |                      |                                                                                                                                                                                                                                                                                                                                                          |       |
| 29 |                           |                      |                                                                                                                                                                                                                                                                                                                                                          |       |
| 30 |                           |                      |                                                                                                                                                                                                                                                                                                                                                          |       |
| 31 | Allocation:               | <a href="#">#16c</a> | Who will generate the allocation sequence, who will enrol participants, and who will assign participants to interventions                                                                                                                                                                                                                                | 16    |
| 32 | implementation            |                      |                                                                                                                                                                                                                                                                                                                                                          |       |
| 33 |                           |                      |                                                                                                                                                                                                                                                                                                                                                          |       |
| 34 |                           |                      |                                                                                                                                                                                                                                                                                                                                                          |       |
| 35 |                           |                      |                                                                                                                                                                                                                                                                                                                                                          |       |
| 36 | Blinding (masking)        | <a href="#">#17a</a> | Who will be blinded after assignment to interventions (eg, trial participants, care providers, outcome assessors, data analysts), and how                                                                                                                                                                                                                | 16-17 |
| 37 |                           |                      |                                                                                                                                                                                                                                                                                                                                                          |       |
| 38 |                           |                      |                                                                                                                                                                                                                                                                                                                                                          |       |
| 39 |                           |                      |                                                                                                                                                                                                                                                                                                                                                          |       |
| 40 |                           |                      |                                                                                                                                                                                                                                                                                                                                                          |       |
| 41 |                           |                      |                                                                                                                                                                                                                                                                                                                                                          |       |
| 42 | Blinding (masking):       | <a href="#">#17b</a> | If blinded, circumstances under which unblinding is permissible, and procedure for revealing a participant's allocated intervention during the trial                                                                                                                                                                                                     | 17    |
| 43 | emergency unblinding      |                      |                                                                                                                                                                                                                                                                                                                                                          |       |
| 44 |                           |                      |                                                                                                                                                                                                                                                                                                                                                          |       |
| 45 |                           |                      |                                                                                                                                                                                                                                                                                                                                                          |       |
| 46 |                           |                      |                                                                                                                                                                                                                                                                                                                                                          |       |
| 47 | <b>Methods: Data</b>      |                      |                                                                                                                                                                                                                                                                                                                                                          |       |
| 48 | <b>collection,</b>        |                      |                                                                                                                                                                                                                                                                                                                                                          |       |
| 49 | <b>management, and</b>    |                      |                                                                                                                                                                                                                                                                                                                                                          |       |
| 50 | <b>analysis</b>           |                      |                                                                                                                                                                                                                                                                                                                                                          |       |
| 51 |                           |                      |                                                                                                                                                                                                                                                                                                                                                          |       |
| 52 |                           |                      |                                                                                                                                                                                                                                                                                                                                                          |       |
| 53 |                           |                      |                                                                                                                                                                                                                                                                                                                                                          |       |
| 54 | Data collection plan      | <a href="#">#18a</a> | Plans for assessment and collection of outcome, baseline, and other trial data, including any related processes to promote data quality (eg, duplicate measurements,                                                                                                                                                                                     | 17    |
| 55 |                           |                      |                                                                                                                                                                                                                                                                                                                                                          |       |
| 56 |                           |                      |                                                                                                                                                                                                                                                                                                                                                          |       |
| 57 |                           |                      |                                                                                                                                                                                                                                                                                                                                                          |       |
| 58 |                           |                      |                                                                                                                                                                                                                                                                                                                                                          |       |
| 59 |                           |                      |                                                                                                                                                                                                                                                                                                                                                          |       |
| 60 |                           |                      |                                                                                                                                                                                                                                                                                                                                                          |       |

training of assessors) and a description of study instruments (eg, questionnaires, laboratory tests) along with their reliability and validity, if known. Reference to where data collection forms can be found, if not in the protocol

|    |                            |                      |                                                                |
|----|----------------------------|----------------------|----------------------------------------------------------------|
| 1  |                            |                      |                                                                |
| 2  |                            |                      |                                                                |
| 3  |                            |                      |                                                                |
| 4  |                            |                      |                                                                |
| 5  |                            |                      |                                                                |
| 6  |                            |                      |                                                                |
| 7  |                            |                      |                                                                |
| 8  |                            |                      |                                                                |
| 9  | Data collection plan:      | <a href="#">#18b</a> | Plans to promote participant retention and complete            |
| 10 | retention                  |                      | follow-up, including list of any outcome data to be            |
| 11 |                            |                      | collected for participants who discontinue or deviate from     |
| 12 |                            |                      | intervention protocols                                         |
| 13 |                            |                      |                                                                |
| 14 |                            |                      |                                                                |
| 15 |                            |                      |                                                                |
| 16 | Data management            | <a href="#">#19</a>  | Plans for data entry, coding, security, and storage,           |
| 17 |                            |                      | including any related processes to promote data quality        |
| 18 |                            |                      | (eg, double data entry; range checks for data values).         |
| 19 |                            |                      | Reference to where details of data management                  |
| 20 |                            |                      | procedures can be found, if not in the protocol                |
| 21 |                            |                      |                                                                |
| 22 |                            |                      |                                                                |
| 23 |                            |                      |                                                                |
| 24 | Statistics: outcomes       | <a href="#">#20a</a> | Statistical methods for analysing primary and secondary        |
| 25 |                            |                      | outcomes. Reference to where other details of the              |
| 26 |                            |                      | statistical analysis plan can be found, if not in the protocol |
| 27 |                            |                      |                                                                |
| 28 |                            |                      |                                                                |
| 29 |                            |                      |                                                                |
| 30 | Statistics: additional     | <a href="#">#20b</a> | Methods for any additional analyses (eg, subgroup and          |
| 31 | analyses                   |                      | adjusted analyses)                                             |
| 32 |                            |                      |                                                                |
| 33 |                            |                      |                                                                |
| 34 | Statistics: analysis       | <a href="#">#20c</a> | Definition of analysis population relating to protocol non-    |
| 35 | population and             |                      | adherence (eg, as randomised analysis), and any                |
| 36 | missing data               |                      | statistical methods to handle missing data (eg, multiple       |
| 37 |                            |                      | imputation)                                                    |
| 38 |                            |                      |                                                                |
| 39 |                            |                      |                                                                |
| 40 |                            |                      |                                                                |
| 41 | <b>Methods: Monitoring</b> |                      |                                                                |
| 42 |                            |                      |                                                                |
| 43 | Data monitoring:           | <a href="#">#21a</a> | Composition of data monitoring committee (DMC);                |
| 44 | formal committee           |                      | summary of its role and reporting structure; statement of      |
| 45 |                            |                      | whether it is independent from the sponsor and competing       |
| 46 |                            |                      | interests; and reference to where further details about its    |
| 47 |                            |                      | charter can be found, if not in the protocol. Alternatively,   |
| 48 |                            |                      | an explanation of why a DMC is not needed                      |
| 49 |                            |                      |                                                                |
| 50 |                            |                      |                                                                |
| 51 |                            |                      |                                                                |
| 52 |                            |                      |                                                                |
| 53 |                            |                      |                                                                |
| 54 | Data monitoring:           | <a href="#">#21b</a> | Description of any interim analyses and stopping               |
| 55 | interim analysis           |                      | guidelines, including who will have access to these interim    |
| 56 |                            |                      | results and make the final decision to terminate the trial     |
| 57 |                            |                      |                                                                |
| 58 |                            |                      |                                                                |
| 59 |                            |                      |                                                                |
| 60 |                            |                      |                                                                |



|    |                          |                      |                                                                |       |
|----|--------------------------|----------------------|----------------------------------------------------------------|-------|
| 1  | Harms                    | <a href="#">#22</a>  | Plans for collecting, assessing, reporting, and managing       | 21    |
| 2  |                          |                      | solicited and spontaneously reported adverse events and        |       |
| 3  |                          |                      | other unintended effects of trial interventions or trial       |       |
| 4  |                          |                      | conduct                                                        |       |
| 5  |                          |                      |                                                                |       |
| 6  |                          |                      |                                                                |       |
| 7  |                          |                      |                                                                |       |
| 8  | Auditing                 | <a href="#">#23</a>  | Frequency and procedures for auditing trial conduct, if        | 22    |
| 9  |                          |                      | any, and whether the process will be independent from          |       |
| 10 |                          |                      | investigators and the sponsor                                  |       |
| 11 |                          |                      |                                                                |       |
| 12 |                          |                      |                                                                |       |
| 13 |                          |                      |                                                                |       |
| 14 | <b>Ethics and</b>        |                      |                                                                |       |
| 15 | <b>dissemination</b>     |                      |                                                                |       |
| 16 |                          |                      |                                                                |       |
| 17 | Research ethics          | <a href="#">#24</a>  | Plans for seeking research ethics committee / institutional    | 22    |
| 18 | approval                 |                      | review board (REC / IRB) approval                              |       |
| 19 |                          |                      |                                                                |       |
| 20 |                          |                      |                                                                |       |
| 21 | Protocol amendments      | <a href="#">#25</a>  | Plans for communicating important protocol modifications       | 22-23 |
| 22 |                          |                      | (eg, changes to eligibility criteria, outcomes, analyses) to   |       |
| 23 |                          |                      | relevant parties (eg, investigators, REC / IRBs, trial         |       |
| 24 |                          |                      | participants, trial registries, journals, regulators)          |       |
| 25 |                          |                      |                                                                |       |
| 26 |                          |                      |                                                                |       |
| 27 |                          |                      |                                                                |       |
| 28 | Consent or assent        | <a href="#">#26a</a> | Who will obtain informed consent or assent from potential      | 23    |
| 29 |                          |                      | trial participants or authorised surrogates, and how (see      |       |
| 30 |                          |                      | Item 32)                                                       |       |
| 31 |                          |                      |                                                                |       |
| 32 |                          |                      |                                                                |       |
| 33 |                          |                      |                                                                |       |
| 34 | Consent or assent:       | <a href="#">#26b</a> | Additional consent provisions for collection and use of        | 23    |
| 35 | ancillary studies        |                      | participant data and biological specimens in ancillary         |       |
| 36 |                          |                      | studies, if applicable                                         |       |
| 37 |                          |                      |                                                                |       |
| 38 |                          |                      |                                                                |       |
| 39 | Confidentiality          | <a href="#">#27</a>  | How personal information about potential and enrolled          | 23    |
| 40 |                          |                      | participants will be collected, shared, and maintained in      |       |
| 41 |                          |                      | order to protect confidentiality before, during, and after the |       |
| 42 |                          |                      | trial                                                          |       |
| 43 |                          |                      |                                                                |       |
| 44 |                          |                      |                                                                |       |
| 45 |                          |                      |                                                                |       |
| 46 | Declaration of           | <a href="#">#28</a>  | Financial and other competing interests for principal          | 24    |
| 47 | interests                |                      | investigators for the overall trial and each study site        |       |
| 48 |                          |                      |                                                                |       |
| 49 |                          |                      |                                                                |       |
| 50 | Data access              | <a href="#">#29</a>  | Statement of who will have access to the final trial dataset,  | 24    |
| 51 |                          |                      | and disclosure of contractual agreements that limit such       |       |
| 52 |                          |                      | access for investigators                                       |       |
| 53 |                          |                      |                                                                |       |
| 54 |                          |                      |                                                                |       |
| 55 |                          |                      |                                                                |       |
| 56 | Ancillary and post trial | <a href="#">#30</a>  | Provisions, if any, for ancillary and post-trial care, and for | 24    |
| 57 | care                     |                      | compensation to those who suffer harm from trial               |       |
| 58 |                          |                      |                                                                |       |
| 59 |                          |                      |                                                                |       |
| 60 |                          |                      |                                                                |       |

participation

|    |                       |                      |                                                                 |
|----|-----------------------|----------------------|-----------------------------------------------------------------|
| 1  |                       |                      |                                                                 |
| 2  |                       |                      |                                                                 |
| 3  | Dissemination policy: | <a href="#">#31a</a> | Plans for investigators and sponsor to communicate trial        |
| 4  | trial results         |                      | results to participants, healthcare professionals, the public,  |
| 5  |                       |                      | and other relevant groups (eg, via publication, reporting in    |
| 6  |                       |                      | results databases, or other data sharing arrangements),         |
| 7  |                       |                      | including any publication restrictions                          |
| 8  |                       |                      |                                                                 |
| 9  |                       |                      |                                                                 |
| 10 |                       |                      |                                                                 |
| 11 | Dissemination policy: | <a href="#">#31b</a> | Authorship eligibility guidelines and any intended use of       |
| 12 | authorship            |                      | professional writers                                            |
| 13 |                       |                      |                                                                 |
| 14 |                       |                      |                                                                 |
| 15 | Dissemination policy: | <a href="#">#31c</a> | Plans, if any, for granting public access to the full protocol, |
| 16 | reproducible research |                      | participant-level dataset, and statistical code                 |
| 17 |                       |                      |                                                                 |
| 18 |                       |                      |                                                                 |

## Appendices

|    |                      |                     |                                                               |
|----|----------------------|---------------------|---------------------------------------------------------------|
| 19 |                      |                     |                                                               |
| 20 |                      |                     |                                                               |
| 21 | Informed consent     | <a href="#">#32</a> | Model consent form and other related documentation            |
| 22 | materials            |                     | given to participants and authorised surrogates               |
| 23 |                      |                     |                                                               |
| 24 |                      |                     |                                                               |
| 25 | Biological specimens | <a href="#">#33</a> | Plans for collection, laboratory evaluation, and storage of   |
| 26 |                      |                     | biological specimens for genetic or molecular analysis in     |
| 27 |                      |                     | the current trial and for future use in ancillary studies, if |
| 28 |                      |                     | applicable                                                    |
| 29 |                      |                     |                                                               |
| 30 |                      |                     |                                                               |
| 31 |                      |                     |                                                               |

None The SPIRIT checklist is distributed under the terms of the Creative Commons Attribution License CC-BY-ND 3.0. This checklist can be completed online using <https://www.goodreports.org/>, a tool made by the [EQUATOR Network](#) in collaboration with [Penelope.ai](#)
